1 **MiRNA and phasiRNAs-mediated regulation of TIR-NBS-**  
2 **LRR defense genes in *Arabidopsis thaliana***

3  
4 **Diego López-Márquez<sup>1</sup>, Ángel Del-Espino<sup>1</sup>, Nieves López-Pagán<sup>1</sup>, Edgar A.**  
5 **Rodríguez-Negrete<sup>1,2</sup>, Ignacio Rubio-Somoza<sup>3</sup>, Javier Ruiz-Albert<sup>1</sup>, Eduardo R.**  
6 **Bejarano<sup>1\*</sup>, Carmen R. Beuzón<sup>1\*</sup>**

7  
8 <sup>1</sup>Instituto de Hortofruticultura Subtropical y Mediterránea “La Mayora”, Universidad de  
9 Málaga-Consejo Superior de Investigaciones Científicas (IHSM-UMA-CSIC), Depto.  
10 Biología Celular, Genética y Fisiología, Málaga, Spain

11 <sup>2</sup>Present address: Consejo Nacional de Ciencia y Tecnología (CONACYT), Instituto  
12 Politécnico Nacional, CIIDIR-Unidad Sinaloa, Departamento de Biotecnología  
13 Agrícola, Guasave, Sinaloa 81101, Mexico

14 <sup>4</sup>Molecular Reprogramming and Evolution (MoRE) Lab, Centre for Research in  
15 Agricultural Genomics (CRAG), Carrer Vall Moronta Edifici CRAG, 08193, Barcelona,  
16 Spain.

17  
18  
19 **\*Correspondence and distribution of material:** cbeuzon@uma.es, edu\_rodri@uma.es  
20 Instituto de Hortofruticultura Subtropical y Mediterránea, Universidad de Málaga-Consejo  
21 Superior de Investigaciones Científicas (IHSM-UMA-CSIC), Depto. Biología Celular,  
22 Genética y Fisiología, Campus de Teatinos s/n, Málaga, E-29071-Spain

23  
24 **Keywords:** miRNA, siRNA, phasiRNA, NBS-LRR, Toll/interleukin-1 domain, plant  
25 immunity, gene silencing

26  
27 **Running Title:** MiRNA and phasiRNAs-mediated regulation of TIR-NBS-LRR genes  
28

29 **Abstract**

30 Plants encode large numbers of intracellular immune receptors known as resistance (R)  
31 proteins or nucleotide-binding (NB) leucine-rich repeat (LRR) receptors (NLRs),  
32 involved in perception of pathogen-derived effectors and activation of immunity.  
33 Here, we report a two-tiered regulatory network mediated by microRNA and secondary  
34 phased small RNAs (phasiRNA) that targets the silencing of dozens of NLR genes  
35 encoding yet uncharacterized members of the Toll/interleukin-1 (TIR)-NBS-LRR  
36 (TNLs) subfamily in *Arabidopsis*. We show that miR825-5p downregulates expression  
37 of *Arabidopsis AT5G38850* gene (renamed as *microRNA-silenced TNL 1* or *MIST1*) by  
38 targeting the sequence coding for a highly conserved functional amino acid motif  
39 (TIR2) within the TIR domain of the receptor. Further, we show that *MIST1* functions  
40 as a regulatory hub, since miRNA825-5p triggers RDR6-mediated processing of *MIST1*  
41 transcripts, to generate *trans*-acting phasiRNAs that in turn target, a wide network of  
42 TNL genes for gene silencing. Regulation through *MIST1* affects disease resistance  
43 against the model bacterial pathogen *Pseudomonas syringae*, since altered levels of  
44 miRNA825-5p lead to changes in *Arabidopsis* ability to establish basal defenses against  
45 this pathogen. MiR825-5p is expressed in unchallenged adult leaves and its production  
46 is down regulated in response to PAMPs such as bacterial flagellin but also fungal  
47 chitin.  
48

## 49 **Introduction**

50 Plants possess complex immune systems that effectively protect them from the majority  
51 of pathogens present in the environment. The correct functioning of these systems rely  
52 on a battery of cell surface and intracellular receptors that alert plants of incoming  
53 threats, through the perception of pathogen-associated molecules or activities, and  
54 activate a cascade of defense responses capable of hindering disease development [1-3].  
55 Immune receptors within the cell surface mediate perception of conserved molecules  
56 collectively known as pathogen-associated molecular patterns (PAMPs), and signal the  
57 activation of basal resistance, also known as PAMP-triggered immunity (PTI) [4].  
58 Intracellular immune receptors detect either the presence inside the cell, or the  
59 perturbations caused within it by pathogen virulence factors (effectors), and activate a  
60 rapid defense response known as effector-triggered immunity (ETI) [1]. ETI reinstates  
61 and enhances PTI and is often associated to the activation of localized programmed cell  
62 death known as the hypersensitive response or HR [1]. Most of these intracellular  
63 receptors belong to a large family of proteins known as NOD-like receptor (NLR)  
64 proteins, which constitute the largest type of resistance (R) proteins, and are  
65 characterized by a multi-domain structure including a variable N-terminal domain, a  
66 nucleotide-binding domain (NB-ARC) and a leucine-rich repeat domain (LRR), hence  
67 their also being known as NBS-LRR proteins [1,3,5]. Most NLRs can be classified into  
68 two major families on the basis on their type of N-terminal domain: those displaying a  
69 Toll/interleukin-1 (TIR) domain, known as TNLs (TIR-NBS-LRR), and those with a  
70 domain that resembles a coiled-coil (CC) domain, generally known as CNLs (CC-NBS-  
71 LRR) [6]. TNLs and CNLs engage the ETI machinery through different key regulators  
72 of plant defense. ETI signaling *via* CNLs relies on NDR1 (non-race-specific disease  
73 resistance 1), while ETI signaling *via* TNLs requires the function of EDS1 (enhanced  
74 disease susceptibility 1), a lipase-like protein that conveys all TNL resistance outputs[7-  
75 10]. Additionally, TNL-mediated ETI responses could enhance basal immunity through  
76 the interaction of EDS1 with PAD4 (Phytoalexin deficient 4) [11-14].

77 Expression of NLR-resistance pathways is tightly controlled in the absence of the  
78 pathogen since constitutive activation can give rise to deleterious effects, *i.e.* mutants in  
79 negative regulators show developmental defects, while increased levels of NLRs can  
80 lead to activation of defense-related phenotypes such as cell wall modifications,  
81 production of reactive oxygen species (ROS) or spontaneous activation of the HR [15-

82 20]. Thus, NLR protein production is down regulated by several mechanisms at  
83 transcriptional, post-transcriptional, translational, and post-translational levels. Small  
84 RNAs (sRNAs) are among the regulators that control NLR production acting at  
85 transcriptional or post-transcriptional level. Regarding post-transcriptional regulation,  
86 21-22 nucleotide-long (21-22 nt) bind to their target mRNA by base pairing, and reduce  
87 the expression of the mRNA-encoded protein either by altering mRNA stability or its  
88 translation, through the action of proteins from the Argonaute family recruited to this  
89 purpose, a process known as post-transcriptional gene silencing (PTGS) [21,22]. Two  
90 types of sRNAs, 21-22 nt microRNAs (miRNAs) and 21 nt small interfering RNAs  
91 (siRNAs), function as suppressors of NLR-encoding mRNAs [23]. PTGS of NLR  
92 expression may also involve 22 nucleotide-long (22-nt) miRNAs that are able to trigger  
93 the conversion of their mRNA targets into double-stranded RNA (dsRNA) molecules,  
94 through the recruitment and ensuing action of RNA-dependent RNA polymerase 6  
95 (RDR6). These dsRNAs are then processed by DICER-LIKE (DCL) 4 to generate  
96 secondary 21 nt siRNA, which are often phased with respect to the binding site of the  
97 miRNA and are known as phasiRNA [24-26]. These secondary phasiRNAs amplify  
98 silencing of the target mRNA and may act *in trans* to silence additional mRNAs, not  
99 primarily recognized by the miRNA triggering the process. Thus, 22 nt miRNAs can  
100 establish regulatory networks/cascades suppressing the expression of several genes by  
101 the combined action of primary miRNA and secondary sRNAs. The best-characterized  
102 endogenous secondary siRNAs are known as *trans*-acting RNAs (tasiRNAs) and their  
103 biogenesis is triggered by 22 nt miRNA-directed cleavage of a non-coding TAS primary  
104 transcript[27-32].

105 Several 22 nt miRNAs have been shown to trigger production of phasiRNAs from  
106 target NLR mRNAs in several plant families, *e.g.* Brassicaceae, Coniferae, Fabaceae,  
107 Rosaceae, Solanaceae, or Vitaceae (reviewed by [26]). The members of the  
108 miR482/2118 families are probably the best characterized and have been identified in  
109 several plant species. Several miRNA families, including miR482/2118, trigger  
110 phasiRNA production mainly by targeting the NLR gene sequences encoding the P-loop  
111 motif, a well-conserved amino acid motif present in the NB-ARC domain of multiple  
112 NLRs from *Arabidopsis*, poplar, tobacco and tomato [33-35]. Mutation of a conserved  
113 residue within the P-loop results in loss of function of many plant NLRs [3]. MiR482,  
114 and related miR472, also target the sequence coding for the P-loop of numerous CNLs

115 and are involved in resistance against bacterial and oomycete pathogens[33-36]. In  
116 legumes, several 22 nt miRNAs target NLRs transcripts, mainly CNLs, triggering  
117 production of phasiRNAs, leading the authors to hypothesize that miRNAs may act as  
118 master regulators of NLR expression via phasiRNA production [23]. In support of this  
119 notion, RDR6 has been shown to act as a negative regulator of plant defense against  
120 bacterial pathogens in *Arabidopsis* [34].

121 In this paper, we focus on the molecular characterization of miRNA825-5p, a miRNA  
122 produced from *MIR825* and conserved among the *Brassicaceae* family, demonstrating  
123 its function as a master regulator of TNLs in *Arabidopsis*. *MIR825* also produces a 21 nt  
124 mature miRNA, originally identified in *A. thaliana* [37], shown to depend on DICER  
125 LIKE (DCL) ribonuclease 1 (DCL1) activity, and to be down regulated during  
126 interaction with a non-pathogenic mutant derivative of *P. syringae* [38]. In this study,  
127 we show that miRNA825-5p targets a sequence coding for a highly conserved amino  
128 acid motif (TIR2) within the TIR domain of the *Arabidopsis AT5G38850* gene.  
129 *AT5G38850* is predicted to encode an uncharacterized TNL, which we have named  
130 microRNA-silenced TNL 1 or MIST1, and its expression had been previously been  
131 shown to be up regulated during infection with *P. syringae*, in the context of induced  
132 systemic resistance (ISR) [39]. The TIR2 conserved target motif immediately precedes  
133 the catalytic residue for a recently described nicotinamide adenine dinucleotide  
134 (oxidized form, NAD<sup>+</sup>)-cleaving activity, essential for TNL function [40]. We show  
135 that miRNA825-5p generates functional secondary phasiRNAs from *MIST1* transcripts  
136 capable of *trans*-acting gene silencing that target the coding sequences of a wide  
137 network of previously uncharacterized TNL-encoding genes in *Arabidopsis*. Regulation  
138 of *MIST1* affects disease resistance against model bacterial pathogen *Pseudomonas*  
139 *syringae*, since inactivation of the miRNA825-5p, using tandem target mimic (STTM)  
140 to prevent primary and secondary regulation of the NLR, enhances *Arabidopsis*  
141 resistance against bacteria, while overexpression of this miRNA render plants more  
142 susceptible to infection. MiR825-5p is expressed in unchallenged adult leaves and its  
143 production is down regulated at transcriptional level in response to PAMPs such as  
144 bacterial flagellin but also fungal chitin. These results confirm the importance of  
145 miRNA-mediated suppression of NLR disease resistance genes, and reveal the existence  
146 of a new regulatory network carried out by miR825-5p and key target gene *MIST1*  
147 acting as a hub, which includes many uncharacterized-TNL genes in *Arabidopsis*

148 through targeting of a very conserved functional motif, involved in a new, recently  
149 identified enzymatic function, essential for TNL defense signaling.  
150

## 151 **Results**

### 152 **MiR825-5p 22 nt miRNA is a candidate regulator of TNLs**

153 We predicted the targets for both 21 nt miR825 and the 22 nt miRNA generated from  
154 opposite arms of the same duplex within the MIR825 transcript, using WMD3  
155 (<http://wmd3.weigelworld.org/cgi-bin/webapp.cgi>) (**Table S1**). Using default  
156 parameters, this analysis rendered only three putative targets for 21 nt miR825, which  
157 were annotated as encoding a poly(A)-binding protein (*ATIG71770*), and two ubiquitin  
158 carboxyl-terminal hydrolase encoding genes (*AT3G47890* and *AT3G47910*) (**Fig. 1A**).  
159 These predictions were remarkably more restrictive than previously reported for this  
160 miRNA [39]. In contrast, this analysis predicted numerous targets for the 22 nt miRNA  
161 derived from *MIRNA825* (top four shown in **Fig. 1A**), and these displayed notably  
162 lower hybridization energies and better pairing, and were consistently annotated as  
163 uncharacterized TNLs (**Table S1**). Three of these predicted targets have been  
164 previously reported to display changes in expression in plants with simultaneously  
165 altered levels of both 21 nt and 22 nt miR825s [39]. Target prediction carried out using  
166 alternative software (psRNATarget, [41]) also often used in the literature for this  
167 purpose rendered little differences (**Table S1**). Predicted processing sites for all putative  
168 target TNL genes mapped to the sequence coding the TIR domains, and in particular to  
169 a conserved site, previously named TIR2 motif [42], which immediately precedes the  
170 catalytic glutamic acid residue for the NAD<sup>+</sup>-cleavage enzymatic activity recently  
171 demonstrated for TIR domains (**Fig. 1B**; [40]). Since the majority of NLRs regulated by  
172 22 nt miRNAs described to date belong to the CNL family [23,33], and only CNLs have  
173 been demonstrated as directly targeted by these miRNAs in *Arabidopsis* [34], this  
174 finding further attracted our attention.

175 Sequence analysis shows that *MIRNA825* is present mainly in brassica species, with the  
176 22 nt miR825 displaying very high conservation (**Fig. 1C**; [43]). Rather surprisingly a  
177 sRNA displaying very high sequence similarity to 22 nt miR825 has been recently  
178 reported in *Triticum aestivum* L. [44]. We carried out data mining of public databases  
179 including 14 libraries from different developmental stages of *Arabidopsis* adult leaves  
180 (Bioproject PRJNA186843), and found that the 22 nt miR825 consistently accumulates  
181 to similar or significantly higher levels than the 21 nt generated from the opposite arm  
182 of the same duplex (**Fig. 1D**). Interestingly, the *MIRNA825* pair has been previously  
183 classified as a Class V miRNA, according to the thermostability of the duplex strands

184 [45]. Class V duplexes differ from the rest in that they form symmetrical miRNA  
185 duplexes with equivalent thermostability at the terminus of both duplex strands,  
186 resulting in equal accumulation of both miRNA and passenger miRNA. Data mining of  
187 public databases showed that 22 nt miR825 is consistently pulled down in association to  
188 AGO1 complexes (**Fig. 1E**) supporting the notion of its involvement in gene silencing  
189 of its target genes.

190 In summary, all these data supports the notion of processing of opposite arms of the  
191 *MIRNA825* duplex leading to the accumulation of two 21 nt and 22 nt functional  
192 miRNAs, thus making the current designation of the 22 nt form as miRNA\* or  
193 passenger miRNA outdated. Thus, in keeping with the designation of these miRNAs in  
194 other brassica species (*e.g.* broccoli [46]; *A. lyrata* **miRBase Release 21**), we will name  
195 these miRNAs as miR825-5p (22 nt, formerly miR825\*) and miR825-3p (21 nt,  
196 formerly miR825)

197

#### 198 **MiR825-5p is a negative regulator of plant immunity against *P. syringae***

199 Prior to characterizing the potential role for miR825-5p as a negative TNL regulator in  
200 *Arabidopsis*, we verified an actual involvement of *MIRNA825*-derived miRNAs in  
201 *Arabidopsis* defense against *P. syringae* (**Fig. 2**). To do so, we engineered transgenic  
202 plants to express an artificial miRNAs (amiRs) [47,48], where the precursor for miR319  
203 is modified to target and silence pri-miR825, as previously reported for other miRNA  
204 precursors (**Fig. 2A**) [49]. As expected, these plants displayed reduced levels of pri-  
205 miR825, and reduced levels of both mature miR825-5p and miR825-3p, compared to  
206 wild type Col-0 plants (**Fig. 2B**). Upon treatment with flg22 flagellin peptide, a major  
207 activator of basal defense (PTI) against bacteria, anti825-expressing plants displayed  
208 enhanced defense responses, as shown by higher production of reactive oxygen species  
209 (ROS) (**Fig. 2C**), and an increased activation of mitogen-activated protein kinases  
210 (MPKs) (**Fig. 2D**). In addition, these plants displayed an increased accumulation of  
211 pathogenesis-related 1 protein (PR-1) in response to inoculation with *P. syringae*  
212 DC3000 expressing avirulence gene *AvrRpt2* (**Fig. 2E**). Finally, as conclusive evidence  
213 of *MIR825* involvement in plant defense against *P. syringae*, *MIR825*-silenced plants  
214 were more resistant to *P. syringae* DC3000 colonization (**Fig. 2F**). These results are in  
215 keeping with a previous report linking overexpression and down regulation of levels of



216 MIR825-derived miRNAs to induce systemic resistance (ISR) within the *Bacillus*  
217 *cereous*/*P. syringae* system [39].

218 Although the large majority of the numerous TNL genes potentially targeted by  
219 miR825-5p are uncharacterized, their nature as pathogen receptors, their prevalence  
220 among the predicted targets, and the strength of their scores when compared to those of  
221 the targets predicted for miR825-3p, suggest that miR825-5p could be responsible for  
222 the up regulation of plant immunity against *P. syringae* produced by silencing of pri-  
223 miR825 (**Fig. 2**). To test this hypothesis, we generated *A. thaliana* transgenic plants  
224 with increased or reduced levels of mature miR825-5p using artificial microRNAs or  
225 STTM technology, respectively (**Fig. 3A and B**) [47,50]. These experimental  
226 approaches allow achieving changes in a specific mature miRNA (*i.e.* miR825-5p) to be  
227 carried out without altering steady state of the additional miRNA generated from the  
228 endogenous pri-miRNA duplex (*i.e.* miR825-3p) [47,50]. The transgenic lines displayed  
229 significantly increased susceptibility (amiR825-5p; **Fig. 3A**), and resistance (STTM825-  
230 5p; **Fig. 3B**) against *P. syringae* DC3000, supporting that miR825-5p acts as a negative  
231 regulator of plant immunity against this pathogen. The impact on *P. syringae*  
232 colonization of plant leaves of the transgenic lines with reduced levels of mature  
233 miR825-5p (**Fig. 3A**) was comparable to that observed in lines with reduced levels of  
234 pri-miR825 (**Fig. 2F**), which results in reduced levels of both miR825-5p and miR825-  
235 3p. These results support miR825-5p, rather than miR825-3p, as the relevant form of  
236 the *MIR825* pair in the regulation of plant immunity against *P. syringae*.

237

### 238 **The *AT5G38850* TIR-NBS-LRR transcript is a target of miR825-5p**

239 Our bioinformatics analysis using WMD3 rendered 18 TNL genes, one of which is  
240 predicted to produce a truncated version containing only the TIR domain, and another  
241 encoding a protein carrying a TIR domain, as potential targets of 22nt miR825-5p (**Fig.**  
242 **1A; Table S1; Fig. 4A**), with *AT5G38850* as the gene displaying lowest hybridization  
243 energy and best pairing. Since some 22 nt miRNAs trigger the production of RNA-  
244 derived phased small interfering RNAs (phasiRNAs) from the target sequence [24,25],  
245 and the predicted processing sites for the TNL genes mapped to the conserved TIR  
246 domains, we compared the accumulation of sRNAs from each *Arabidopsis* NLRs. We  
247 carried out data mining of public databases and found that the number of sRNAs  
248 derived from top target *AT5G38850* in adult leaves was the largest for any NLR gene in

249 the *Arabidopsis* genome (**Fig. 4B**). A close examination of sRNAs generated from those  
250 that accumulate the most is shown in **Fig. S1**.

251 Processing of the miR825 duplex has been proposed to depend on the activities of  
252 DCL1 and DCL3 [38,51]. Thus, as a first step in the characterization of miR825-5p  
253 targets, we confirmed that accumulation of pri-miR825 increased in a *dcl1-7* mutant  
254 (**Fig. 5A**), while levels of miR825-5p were significantly reduced. As expected from the  
255 notion of miR825-5p targeting *AT5G38850*, transcript levels of this gene were  
256 significantly increased. To seek direct validation of miR825-5p regulation of  
257 *AT5G38850*, we generated a gene fusion of the genomic sequence of the *AT5G38850*  
258 (including its own 5'-UTR region, exons and introns) to the Green Fluorescent Protein  
259 gene (*GFP*) ORF, to be transcribed under the control of a 35S constitutive promoter  
260 (wt-*AT5G38850*; **Fig. 5B**). As control, we generated a modified version of this gene  
261 fusion in which the miR825-5p target site is no longer complementary to this miRNA  
262 without altering the corresponding amino acid sequence (m-*AT5G38850*; **Fig. 5B**). *N.*  
263 *benthamiana* leaves co-expressing wt-*AT5G38850* and miR825-5p accumulate very low  
264 levels of GFP, when compared to those accumulated in leaves co-expressing the gene  
265 and unrelated miR319 (**Fig. 5C**). Furthermore, GFP levels of control leaves expressing  
266 wt-*AT5G38850* and miR319 were similar to those detected in leaves co-expressing  
267 m-*AT5G38850* and either miR825-5p or miR319 (**Fig. 5C**). These results indicate that  
268 miR825-5p targets and regulates mRNA accumulation of *AT5G38850* by recognizing a  
269 complementary sequence located at the TIR domain. In support of this notion, we  
270 measured the level of expression of endogenous *AT5G38850* in relation to levels of  
271 miR825-5p in previously generated transgenic plants displaying altered levels of this  
272 mature miRNA (**Fig. 3**). In keeping with results shown in **Fig. 5C**, accumulation of  
273 endogenous *AT5G38850* transcripts displayed a negative correlation with levels of  
274 miR825-5p in all different genotypes tested (**Fig. 5D**). Based on these results, we named  
275 *AT5G38850 MIST1* for miRNA-silenced TNL-1, and will refer to it as such hereafter.

276

### 277 **MiR825-5p triggers phasiRNAs production from target *MIST1* transcripts**

278 Data mining results show that sRNA accumulation derived from *MIST1* is notably  
279 larger than those derived from any of the other NLR-encoding candidate targets genes  
280 of miR825-5p (**Fig. 4B**), including the known CNL-encoding gene targets of the RDR6-  
281 mediated regulation triggered by miR472 (*RPS5*, *RSG1* and *AT5G43740*) [25,34,52].

282 MiR825-5p is predicted to arise from an asymmetric fold-back precursor containing  
283 asymmetric bulges (**Fig. 6A and B**), a characteristic associated to the ability to 22 nt  
284 miRNA to trigger phasiRNA production from complementary targets [24,25,53], thus  
285 suggesting miR825-5p as a potential trigger of phasiRNA production from *MIST1*, in  
286 keeping with previously reported computational predictions [24,54]. Interestingly, a  
287 previous study found a positive correlation between levels of this miRNA and  
288 accumulation of siRNAs from *MIST1* during induced systemic resistance (ISR) [39],  
289 however changes in RDR6, such as those reported during PTI [34], could be responsible  
290 for this correlation. Close examination of the sRNAs produced from *MIST1* supports the  
291 role of miR825-5p as a trigger of phasiRNA on this locus: (i) the first sRNA that  
292 accumulates at significant levels from the positive strand of *MIST1* maps between  
293 positions 10-11 after the predicted cleavage site of miR825-5p in *MIST1* (**Fig. 6C, D**  
294 **and E**), and (ii) sRNAs that accumulate from this cleavage site onwards displays  
295 regular spacing befitting DCL4-mediated production of phased RNAs (**Fig. 6F**).  
296 Interestingly, Branscheid and collaborators [55] reported that siRNAs are produced  
297 from the target fragment that displays the least stable base pairing to the miRNA. In the  
298 case of miR825-5p pairing with *MIST1* mRNA, this would be the 3' target fragment  
299 (**Fig. 6G**), in keeping with miR825-5p production of sRNAs from *MIST1* taking place  
300 at the 3' side of the miR825-5p target sequence.

301 Additional evidence to support that siRNAs from *MIST1* are the product of a canonical  
302 biogenesis pathway of tasiRNAs/phasiRNAs (RDR6-DCL4 dependent) can be gathered  
303 from the accumulation of *MIST1*-derived sRNAs in adult leaves as described in public  
304 libraries for *dcl2/4* and *rdr6 Arabidopsis* mutants (SRA Bioproject: SRP097592). Data  
305 mining of siRNA accumulation in single and double mutants revealed that accumulation  
306 of 21/22 nt siRNAs derived from both plus and minus strand of *MIST1* require the  
307 function of RDR6 (**Fig. 7A and B**), as previously reported for tasi/phasiRNAs  
308 production [27-30].

309 Mutation of either *dcl2* or *dcl4* causes a small decrease in siRNA levels when compared  
310 to the wild type (on average 93% and 77% of wild type levels, respectively), but the  
311 combination of the *dcl2* and *dcl4* mutations causes a dramatic reduction on the  
312 accumulation of siRNA from this locus (on average less than 6% of wild type levels)  
313 (**Fig 7B**). Indeed, siRNAs accumulating in the *dcl2/4* double mutant is limited to DCL3-  
314 derived 24 nt siRNAs (**Fig. 7C**) supporting a degree of functional overlap between

315 DCL2 and DCL4 consistent with previously published reports [56,57]. Percentages of  
316 first nucleotide composition were similar in wild type, *dcl2* and *dcl4* single mutants and  
317 different from those detected in the *dcl2/4* double mutant (**Fig. 7D**). The abundance of  
318 Ts and As in the first nucleotide of the wild type populations suggests these sRNAs  
319 could be potentially loaded onto AGO1 and AGO2, respectively[58].

320 Finally, we used amiR825-5p and STTM825-5p lines, which display elevated and  
321 decreased levels of mature of miR825-5p, respectively (described in **Fig. 3A**), to  
322 analyze production of phasiRNAs from *MIST1* (**Fig. 8**). Using small RNA Northern blot  
323 analysis, we found that accumulation of phasiRNAs from this locus (**Fig. 8A**) was  
324 directly correlated with the level of expression of mature miR825-5p in each of the lines  
325 tested: a faint band could be seen in wild type plants, and even fainter bands in  
326 STTM825-5p plants, while stronger bands were detectable in the amiR825-5p lines, in  
327 correspondence to their respective levels of expression (**Fig. 3A and Fig. 5D**).  
328 Furthermore, phasiRNAs derived from *MIST1* are found to be loaded onto AGO1 and  
329 AGO2 complexes in basal conditions in wild type plants (**Fig. 8B, C and D**),  
330 supporting their potential involvement in transitive silencing.

331

### 332 **MiR825-5p-triggered phasiRNAs produced from *MIST1* can act *in trans* to silence** 333 **gene expression**

334 To confirm that miR825-5p-triggers generation of phasiRNAs from its *MIST1* target  
335 site, we used miRNA-Induced Gene Silencing technology (MIGS) [59] to generate  
336 *Arabidopsis* transgenic plants expressing a gene fusion between the miR825-5p *MIST1*  
337 target sequence and *Arabidopsis AGAMOUS* gene under a CaMV 35S promoter  
338 (MIGSS825-5pTS; **Fig. 9A**). Thus, if miR825-5p triggers siRNA production at this site,  
339 it would lead to the generation of phasiRNAs from the *AGAMOUS* transcript that would  
340 silence *AGAMOUS* expression and cause typical flower phenotypes associated to lack  
341 of *AGAMOUS* function [59,60], thus acting as a proxy to demonstrate miR825-5p  
342 phasiRNA-mediated transitivity. Transgenic plants expressing MIGSS825-5pTS  
343 displayed no apparent flower phenotype (**Fig. 9B and C**). This result could be due to  
344 levels of mature miR825-5p in flowers not being sufficient to silence the highly  
345 expressed *AGAMOUS* gene [61]. Levels of mature miR825-3p have been reported to be  
346 significantly lower in flowers than in leaves [51]. To cover this eventuality, we crossed  
347 our lines carrying the *AGAMOUS* sensor system with those expressing miR825-5p from

348 the CaMV 35S within the amiR825-5p construct described above (**Fig. 3A**). These  
349 plants, carrying both constructs (MIGSS825-5pTS and amiR825-5p) displayed flower  
350 phenotypes typically caused by a mild to moderate silencing of the *AGAMOUS* gene  
351 [62], including distorted pistil, lack of maturation of the stamens, and infertility (**Fig.**  
352 **9B and C**). Control plants expressing the amiR825-5p construct only displayed wild  
353 type flower phenotypes (**Fig. 9B and C**). This is in keeping with miR825-5p triggering  
354 *in trans* silencing of endogenous *AGAMOUS* when acting at the target site of *MIST1*.

355

### 356 **The *MIR825* promoter is down regulated in response to perception of pathogen** 357 **associated molecular patterns (PAMPs)**

358 Down regulation of plant immunity against *P. syringae* by miR825-5p and phasiRNAs  
359 generated from *MIST1* could be lifted during pathogen interaction by different  
360 mechanisms. Since levels of mature miR825-3p, whose targets are not seemingly linked  
361 to immunity, have been previously reported to decrease following bacterial perception  
362 [38,39,63] we investigated whether *MIR825* could be regulated at a transcriptional  
363 level. Inoculation with *P. syringae* DC3000 caused a 70% decrease in pri-miR825  
364 accumulation at 3 hours post-inoculation (**Fig. 10A**). A similar reduction was observed  
365 after treatment with the elicitor flagellin peptide flg22 (**Fig. 10B**), suggesting flagellin  
366 perception is responsible for the down regulation observed following bacterial entry.  
367 However, this down regulation is not specific to flagellin perception since a similar  
368 decrease in the accumulation of pri-miR825 is observed in Col-0 *fls2* mutant plants  
369 (unable to perceive flagellin) with *P. syringae* DC3000 (**Fig. 10C**), indicating that  
370 regulation of pri-miR825 levels is part of PAMP-triggered immunity, and others  
371 PAMPs present in this pathogen can trigger a similar effect. To determine if pri-miR825  
372 down regulation was specific to bacterial PAMP-perception, we treated plants with  
373 chitin, a fungal PAMP equivalent to bacterial flagellin (**Fig. 10D**), and found that pri-  
374 miR825 was similarly reduced after treatment, supporting that pri-miR825 expression  
375 responds to general PAMP perception. To follow the dynamic of changes on pri-  
376 miR825 levels following PAMP perception, we carried out a time-course experiment  
377 upon flg22 treatment using RT-*q*PCR (**Fig. 10E**). The results showed a drastic drop in  
378 pri-miR825 accumulation at 3h after treatment, followed by a slow progressive  
379 recovery, reaching levels similar to those detected before PAMP perception 48h later.

380 Down regulation of miRNA precursor levels can be established at different levels. To  
381 determine if transcriptional down regulation of the *MIR825* gene promoter is involved  
382 in down regulation of pri-miR825 levels upon PAMP-perception, we generated *A.*  
383 *thaliana* transgenic lines expressing the *GFP* gene under the control of the *MIR825*  
384 promoter (**Fig. 10F**). Western-blot analysis of GFP levels in several independent  
385 transgenic lines, confirmed GFP protein accumulation in adult leaves (**Fig. S1**).  
386 Treatment of these lines with flg22 determined similar dynamics between GFP mRNA  
387 and pri-miR825 transcript accumulation (**Fig. 10F**). A slight delay of GFP mRNA level  
388 accumulation is observed, perhaps due to the processing of pri-miR825 by DCL1, a  
389 process likely to contribute to a quicker reduction of the precursor. Interestingly,  
390 although levels of pri-miR825 had recovered considerably 24 h after treatment with  
391 flagellin, these are still significantly lower 24 hours post-inoculation (hpi) with *P.*  
392 *syringae* DC3000 (**Fig. 10G**). Levels of miR825-5p also displayed a decrease 24 hpi,  
393 although this decrease was not as strong as that seen for pri-miR825 levels (**Fig. 10H**).  
394 A similar trend could be observed for phasiRNAs generated from *MIST1* transcripts at  
395 both time points (**Fig. 10I**).  
396

## 397 Discussion

398 The current theory on the evolution and maintenance of stable resistance polymorphism  
399 requires cost of resistance and/or virulence acting in combination with frequency-  
400 dependent selection [18,64]. Pathogen resistance can have two distinct types of fitness  
401 costs: (i) the cost of surveillance, which results from harboring R genes in anticipation  
402 of pathogen attack [65], and (ii) the cost of defense that accrues from the activation of  
403 resistance during the actual pathogen attack [16,65]. The cost of surveillance is  
404 measured in the absence of disease and has been established in *Arabidopsis* for two R  
405 genes: *RPS5* and *RPM1* in [15,17]. MiRNA-mediated regulation of NLRs has been  
406 proposed to act mainly by lowering the cost of surveillance, keeping down the  
407 expression of regulated R genes, and preventing accidental activation of their  
408 expression in the absence of a pathogen threat [34,35]. Among the miRNA  
409 demonstrated to regulate expression of NLRs, 22nt miRNAs seem to be key elements,  
410 since they have the potential to establish a wider suppression of the resistance genes by  
411 triggering the production of secondary siRNA from primary target genes. The fact that  
412 RDR6 is down regulated during PTI and that *rdr6* mutants present stronger ROS and  
413 callose deposition upon flagellin treatment and are primed for expression of PTI marker  
414 genes [34], strengthens the significance of this mechanism in plant immunity. NLRs  
415 have been classified as phasiRNA or phasiNLR-producing loci when 10 or more 21-22  
416 nt phased siRNAs accumulate from its sequence [35]. Whereas numerous CNL genes  
417 have been shown to give rise to accumulation of phasiNLRs in many plant species, just  
418 a few examples of sRNA accumulation have been reported for TNL genes [23,26,33-  
419 36,66].

420 In this paper, we characterize miR825-5p, a 22 nt miRNA that controls the expression  
421 of numerous TNLs genes in *Arabidopsis* through primary targeting of a highly  
422 conserved motif (TIR2) within the TIR domain recently linked to a novel enzymatic  
423 function essential for defense signaling [40,42]. The differences in number, scores,  
424 pairing and annotations of the predicted targets for each of the two miRNAs derived  
425 from *MIR825* (5p/3p), their different degrees of conservation, as well as miR825-5p  
426 accumulation in adult leaves and association to AGO1 complexes (**Fig. 1**), convinced us  
427 that the initial denomination of 22 nt miR825 as a passenger miRNA (miR825\*) was  
428 outdated. The fact that the contribution of *MIR825* to plant defense against *P. syringae*  
429 (**Fig. 2**) can be recapitulated by miR825-5p alone (**Fig. 3**) reinforced that conclusion.

430 Our interest in miR825-5p role in regulating immunity was spurred by its characteristics  
431 consistent with an ability to trigger RDR6/DCL4-mediated production of phasiRNAs  
432 from complementary targets [24,25,53], since it is a 22 nt miRNA predicted to be  
433 produced by DCL1 from an asymmetric fold-back precursor containing asymmetric  
434 bulges (**Fig. 6A**). Accumulation of sRNA from its potential targets led us to close in top  
435 target *MIST1* (*AT5G38850*) (**Fig. 1 and Fig. 5**) as a potential regulatory hub through the  
436 production of phasiRNAs (**Fig. 4, and Fig. 6**). Evidence supporting this notion is found  
437 in: (i) the accumulation of siRNAs from *MIST1* and its pattern in relation to the  
438 miR825-5p target site in this locus (**Fig. 6**), (ii) its dependency on the function of RDR6  
439 and that of DCL2/DCL4 (**Fig. 7**), and (iii) in its correlation to miR825-5p levels and  
440 loading into AGO1/AGO2 complexes (**Fig. 8**).

441 *MIST1* displays the domain structure of a canonical TIR-NB-ARC-LRR. The fact that  
442 *MIST1* contains in its TIR domain the conserved putative catalytic glutamic acid and  
443 neighboring residues recently described by [40], as well as a canonical P-loop (Walker  
444 A) motif in its NB-ARC domain, suggests that it is an active NLR, and not only a hub  
445 for the generation of phasiRNAs. TIR domains are susceptible of self-association,  
446 which are required for the essential NADase activity displayed by active plant TNLs  
447 [40,67]. A structural-homology search with *MIST1* using the Phyre2 web portal for  
448 protein modeling [68] returned several plant TIR domains with high confidence. The  
449 best hit corresponds to the TIR domain of the TNL SNC1 [69,70], predicted with 100%  
450 confidence over 155 amino acid residues (8-163), encompassing the *MIST1* predicted  
451 TIR domain; SNC1 is included amongst the structure-based phylogeny of proteins  
452 similar to hSARM1<sup>TIR</sup> as described by [67]. The available data on TIR-TIR interactions  
453 is compatible with their association into high-order oligomers, stabilized in activated  
454 NLRs by self-association of other domains such as NB-ARC [71]. Interestingly, *MIST1*  
455 also displays high structural homology with the CNL ZAR1 [72], predicted with 100%  
456 confidence over 700 amino acids (120-820) mostly outside *MIST1* TIR domain, despite  
457 ZAR1 and *MIST1* only sharing 18% sequence identity over the same region. It has been  
458 recently shown that a complex formed by ZAR1-RKS1-PBL2<sup>UMP</sup> assembles into a  
459 high-order oligomeric complex in the form of a wheel-like pentamer (the resistosome),  
460 a structure that is required for immune signaling. The assembly is mediated by all the  
461 structural domains of ZAR (CC-NB-ARC-LRR), is further stabilized by ATP, and  
462 undergoes fold-switching during ZAR1 activation [72]. Considering the structural



463 homology, it is tempting to speculate that MIST1 might also be assembling into high-  
464 order complexes *via* TIR-TIR oligomerization further stabilized by interaction among  
465 its NB-ARC-LRR domains, in a ZAR1-like manner. ZAR1 appears to be a recognition  
466 hub for at least three different bacterial effectors from different bacteria [73-75]. It  
467 might be the case that MIST1, on top of its function as a key regulatory hub for TNL  
468 expression at the RNA level, could also be acting as a recognition hub at the protein  
469 level.

470 *MIST1* is the first locus described in *Arabidopsis* that gives rise to phasiTNLs and,  
471 remarkably, triggers a larger accumulation of siRNA than any other NLR within the  
472 *Arabidopsis* genome (**Fig. 4**). This includes *RPS5*, *RSG1* and *AT5G43740*, the CNL  
473 gene targets of the RDR6-mediated regulation triggered by miR472 processing  
474 [25,34,52]. The finding that phasiRNAs generated from *MIST1* are loaded onto AGO1/  
475 AGO2 complexes (**Fig. 8**), and that miR825-5p target site on *MIST1* can trigger *in trans*  
476 silencing of an AGAMOUS-based transitivity reporter (**Fig. 9**), supports the notion of  
477 these phasiRNAs being active and capable of establishing a second layer of regulation  
478 upon TNL gene expression. In further support of this notion, the predicted regulatory  
479 network of miR825-5p, including the five phasiRNA that accumulate from *MIST1* and  
480 are loaded onto AGO1 and/or AGO2 to highest levels, points to miR825-5p and its  
481 target *MIST1* as a key central hub for direct and indirect phasiRNA-mediated regulation  
482 of a very large number of TNLs. Indeed, when using default parameters for network  
483 prediction, the number of elements included in the miR825-5p/phasiTNLs network was  
484 unwieldy (**Table. S2**). This led us to apply more stringent parameters to reduce the size  
485 of the network to a manageable size (**Fig. 11**). We named phasiTNL-targeted TNLs  
486 (*PHATT* genes) those TNL genes within the network not directly regulated by miR825-  
487 5p but targeted by the phasiTNLs generated from *MIST1*. We found that phasiTNL4  
488 displays a distinctly larger numbers of: (i) reads associated to AGO2 complexes (**Fig.**  
489 **8**), and (ii) predicted target genes, seemingly acting as a secondary hub for TNL  
490 regulation. Interestingly, mapping of the phasiTNL4 target site onto the corresponding  
491 *PHATT4* genes showed this phasiTNL targets another highly conserved motif within the  
492 TIR domain, the TIR3 motif [42]. Thus, our results indicate that miR825-5p is part of  
493 the mechanism by which RDR6 acts as a negative regulator of plant immunity (**Fig. 2, 3**  
494 **and 7**).

495 MiR472 and miR482/2118-mediated NLR silencing is lifted during the onset of PTI

496 [33,34,36] when targeted NLR genes are likely to become transcriptionally active. In  
497 these circumstances, mature levels of these miRNAs decrease, lifting the silencing of  
498 NLR genes, while down regulation of RDR6 expression coupled with a reduction on  
499 siRNAs generated from these loci is expected to act by amplifying NLR gene  
500 activation. The data show that *MIR825* is transcriptionally down regulated during PTI  
501 and that this regulation is not restricted to response against flagellin, or for that matter  
502 against bacterial pathogens, since it also responds to the fungal PAMP chitin (**Fig. 10**),  
503 thus fitting into a model where miR825-5p silencing of TNLs would prevent the  
504 accidental onset of defenses in the absence of an incoming pathogen (**Fig. 12**).  
505 Interestingly, during preparation of this manuscript, a report established miR825-5p and  
506 3p are involved in ISR triggered within the *B. cereus/ Botrytis cinerea* pathosystem  
507 [76]. In regards to the transcriptional down regulation of *MIR825*, a recent report  
508 showed that mutations that lead to over accumulation and nuclear localization of TNL  
509 protein SNC1 repress transcription of *MIR* genes, including *MIR825* [54]. These authors  
510 showed that *MIR* gene down regulation correlates with reduced accumulation of siRNA  
511 from several loci (including *MIST1/AT5G38850*), and increased expression of many  
512 NLR genes, and propose that SNC1 modulates immunity through the regulation of  
513 miRNA and phasiRNA biogenesis. Their results fit with those presented in here,  
514 opening the possibility of SNC1, likely together with co-repressor TPR1, being the  
515 mechanism responsible for *MIR825* transcriptional response to PAMPs. Taking all this  
516 into consideration, our model proposes that *in trans* silencing carried out by miR825-  
517 5p-triggered phasiTNLs generated from *MIST1* does not only play a role on amplifying  
518 the silencing signal on primary target TNL genes, but also by expanding the regulation  
519 to secondary targeted TNLs, different from those directly targeted by miR825-5p (**Fig.**  
520 **11 and 12**). The results obtained by challenging with *P. syringae* transgenic plants  
521 displaying increased or reduced accumulation of miR825-5p (**Fig. 3**) demonstrate that  
522 miR825-5p mediated TNL silencing plays a relevant role in the regulation of plant  
523 immunity.

524 Targeting of conserved sequences encoding functionally relevant motifs provides a  
525 potential evolutionary link between protein function and miRNA-mediated regulation  
526 by coupling evolution of the one to evolution of the other. Indeed, such a link is also  
527 present in the miRNA-regulation of CNLs, and a few TNLs, in *M. sativa*. Most  
528 members of the miR472/miR482/miR2118 superfamily target the coding sequence for

529 the highly conserved P-loop or Walker motif, essential for defense signaling [33],  
530 whereas miR1507 targets the Kinase-2 motif of the CC domain of a CNL-encoding  
531 gene [23]. No such evolutionary link has been established between function and  
532 regulation within the TIR domain prior to this report. MiR825-5p-mediated silencing of  
533 TNL is an example of coupled evolution of regulation of plant immunity, and the first  
534 that does so through targeting the coding sequence for a functional site within the TIR  
535 domain, the TIR2 motif, linked to the NAD<sup>+</sup>-cleavage enzymatic activity, thus  
536 specifically controlling TNL genes. Moreover, miR825-5p-dependent phasiTNL4  
537 targets the sequence coding for TIR3, another highly conserved, motif within the TIR  
538 domain.

539 MiR825-5p is conserved in Brassicaceae (**Fig. 1**; [43,46]). Using miR825-5p to search  
540 for potential target genes in the *B. oleracea* genome in a recently created web browser  
541 (<https://plantsmallrnagenes.science.psu.edu/>; [77]), we found that several of its  
542 predicted targets, which display sequence similarity to *Arabidopsis* TNL genes, do  
543 accumulate significant amounts of 21 nt siRNAs, supporting the potential conservation  
544 of miR825-5p TNL regulatory network among Brassicaceae (**Fig. S3**). A recent report  
545 has identified an sRNA matching miR825-5p sequence as produced outside brassica  
546 species, in wheat (*Triticum aestivum* L.) [44]. Interestingly, wheat does not encode  
547 TNLs, since all its NLRs belong to the CNL family. TNLs have been proposed to arise  
548 in early plants and to have been later lost in monocots [43]. Since targets TNLs through  
549 TIR2, linked to cleavage of NAD<sup>+</sup> cleaving activity [40,67], miR825-5p might target  
550 genes encoding NAD<sup>+</sup>-cleaving enzymes in wheat. In this regard, a structure-based  
551 phylogeny inferred by [67] suggests that TIR domains might be part of a superfamily of  
552 structurally related proteins not usually associated to TIR domains (such as  
553 glycosyltransferases, nucleoside hydrolases or flavodoxins), but able to bind nucleotides  
554 in the analogous region of the protein.

555 Previous reports on miRNA-mediated regulation of CNLs have highlighted the role in  
556 lowering the cost of surveillance of miRNA-mediated regulation of CNLs, but these  
557 have also shown these miRNAs have a potential role in lowering the cost of defense  
558 [34,35]. Our results support miR825-5p is involved in repressing TNL expression in  
559 basal, unchallenged, conditions and potentially be thus involved in lowering the cost of  
560 surveillance. Although no apparent fitness defect phenotype has been observed in plants  
561 with decreased miR825-5p accumulation, the fitness cost of these knock down lines

562 have not been investigated in depth. In addition, our results also support miR825-5p  
563 role in keeping defenses under control during the onset of PTI. In this regard, it is  
564 interesting that miR825-5p regulation of TNLs, like the majority of miRNA-mediated  
565 regulatory networks involving NLRs described to date [34-36], has an impact on plant  
566 basal immunity, in the absence of R-mediated effector-recognition. NLR genes are  
567 normally associated with dominant gene resistance and this role was indeed the first  
568 described for a NLR gene [78], constituting the basis of race-specific resistance and  
569 involving the direct or indirect recognition of a pathogen effector protein. Although we  
570 cannot rule out an additional role for miR825-5p in regulating ETI, since miR825-5p  
571 targeted genes encode uncharacterized TNLs, it would have to be on the regulation of  
572 ETI mediated by a yet uncharacterized effector/R-gene pair in the *Arabidopsis/ P.*  
573 *syringae* pathosystem or by effectors from a different bacterial or fungal pathogen. On  
574 this note, AT5G18360, a putative primary target for miR825-5p, has been recently  
575 identified as a TNL involved in triggering ETI against Pto DC3000 effector HopB [79].  
576 As proposed in tomato [35], miR825-5p may have a quantitative contribution to plant  
577 defenses, perhaps controlling low-level recognition of pathogen effectors in the absence  
578 of proper ETI. Further work will be necessary to characterize the role of the numerous  
579 TNL genes belonging to the miR825-5p regulon.

580

## 581 **Methods**

### 582 **Plant material and growth**

583 *Arabidopsis thaliana* plants were grown in soil, or MS plates without sucrose, at 21°C  
584 with a photoperiod of 8h light/16h darkness with a light intensity of 200  $\mu\text{mol}/\text{m}^2/\text{s}$ . For  
585 MS growth, seeds were surface sterilized with a mixture of ethanol and bleach for 15  
586 min and washed three times with ethanol. In all cases seeds were stratified for 2 days at  
587 4°C. When selecting transformants, MS plates supplemented with either kanamycin (50  
588  $\mu\text{g}/\text{ml}$ ) or hygromycin (40  $\mu\text{g}/\text{ml}$ ) were used. *Nicotiana benthamiana* plants were grown  
589 in soil in temperature-controlled chambers, at 22°C with a controlled photoperiod of 16h  
590 light/8h dark with a light intensity of 200  $\mu\text{mol}/\text{m}^2/\text{s}$ .

591

### 592 **DNA procedures**

593 All DNA fragments generated by PCR for cloning were amplified using the Q5 High-  
594 Fidelity DNA polymerase (NEB, USA), as indicated by manufacturer. Depending on  
595 the construct, these fragments were alternatively cloned into pGEM-T (Promega, USA)  
596 or into pENTR (Thermo Fisher Scientific, USA) digested with *NotI-AsCI*. Derivatives of  
597 pGEM-T thus obtained were further digested to obtain the PCR-amplified cloned  
598 fragments for classic ligase-based cloning into the corresponding destination vector. For  
599 PCR-amplified fragments initially cloned into pENTR, LR reactions were carried out to  
600 generate the final vectors. For a detailed description on the cloning process for each  
601 specific construct see supplemental material. Routine PCRs for cloning confirmation or  
602 plant genotyping were performed using Gotaq Flexi DNA Polymerase (Promega, USA)  
603 following instructions from the manufacturer. Sequences for primers used in this work  
604 can be found in **Table S3**.

605

### 606 **RNA procedures**

607 Total RNA from seedlings or adult leaves was extracted using TRISURE (Bioline, UK)  
608 according to instructions from the manufacturer, using 100 mg of the corresponding  
609 plant tissue, previously frozen and grounded in liquid nitrogen. RT reactions were  
610 performed using iScript cDNA Synthesis Kit (Bio-Rad, USA) and 1  $\mu\text{g}$  of total RNA,  
611 previously treated with DNaseI (Takara, Japan).

612 For semi-quantitative PCRs quantification of pri-miR825, we used 1  $\mu$ l of the cDNA  
613 obtained as described, and the number of cycles was restricted to non-saturating  
614 conditions (typically 20-28 cycles depending of the gene).

615 For RT-*q*PCRs, we used 2  $\mu$ l of a 1/5 dilution of the cDNA obtained as above in a  
616 reaction containing 5  $\mu$ l of SsoFast EvaGreen (Bio-Rad, USA), 0.5  $\mu$ l of Forward  
617 primer (10  $\mu$ M) 0.5  $\mu$ l Reverse primer (10  $\mu$ M) and 2  $\mu$ l of H<sub>2</sub>O. These RT-*q*PCRs  
618 were performed using a CFX96 or CFX384 machine (Bio-Rad) with a first denaturing  
619 step at 95°C 1 min, and 45 cycles of 95°C 10 s and 60°C 15 s. In all cases ACT2 was  
620 used as internal control. Relative expression was calculated using the  $2^{-\Delta\Delta Ct}$  method  
621 [80].

622 For quantification of mature miRNAs, we used the stem-loop RT-*q*PCR method [81].  
623 Pulsed-RT (1 step at 16°C of 30 min, followed by 60 cycles at 30°C for 30 s, 42°C for  
624 30 s and 50°C for 1 min, and 1 cycle of 85°C for 5 min) was performed using Revert  
625 Aid First Strand cDNA Synthesis Kit (Thermo Fisher Scientific, USA) with specific RT  
626 stem-loop primers and oligo (dT). Stem loop RT-*q*PCRs were performed in a CFX96 or  
627 CFX384 (Bio-Rad) machine using the protocol previously described by[81].

628 For small RNA northern blot analysis, we extracted total RNA using TRISURE  
629 (Bioline, UK), and use it for Northern blots analyses carried out as previously described  
630 by [82]. In brief, 50  $\mu$ g of total RNA were suspended into 2x RNA loading buffer (95%  
631 formamide, 18 mM EDTA pH 8.0, 0.025% sodium dodecyl sulfate (SDS), 0.01%  
632 bromophenol blue, 0.01% xylene cyanol) and denaturated at 90°C for 5 min. Then,  
633 samples were separated by electrophoresis in a 7M urea, 0.5X TBE, 17%  
634 polyacrylamide gel. After that, RNA was electro-blotted onto an Amersham Hybond-  
635 N+ nylon membrane (GE Healthcare Life Sciences, USA) at 80 V for 1 hour in cold  
636 0.5x TBE. RNA was fixed onto the membrane by exposing it to, 0.120 J of UV after  
637 which the membrane incubated at 80°C for 1 hour. Afterwards, the membrane was pre-  
638 hybridize in Church buffer (1% BSA, 1 mM EDTA, 0.5 M phosphate buffer, 7% SDS)  
639 for 1 h at 40°C. For hybridization, the probe was added to Church buffer and incubated  
640 overnight at 40°C. The next day, membranes were washed 3 times with a 2x SSC, 0.1%  
641 SDS solution at 40°C (10 min per wash) and detection was carried out as previously  
642 described by [82].

643 For probe labelling, a DNA oligonucleotide reverse complement to U6 was 3'-end-  
644 labelled with Digoxigenin-11-ddUTP (Sigma, USA) using a Terminal  
645 Deoxynucleotidyl Transferase (TdT; ThermoFisher SCIENTIFIC, USA) in a reaction  
646 containing: 20 Units TdT, 10 µl 5x TdT reaction buffer, 5 µl DNA primer (1 µM), 2.5  
647 µl Digoxigenin-11-ddUTP (10 µM) and bidistilled H<sub>2</sub>O to 50 µl. The reaction was  
648 incubated for 40 min at 37°C and directly added to the hybridization solution without  
649 further purification.

650 For secondary siRNA detection, a fragment of *MIST1* was PCR amplified using Q5  
651 DNA polymerase (NEB USA) with MIST1\_PhasiRNA\_ProbeF and  
652 MIST1\_PhasiRNA\_ProbeR. PCR product was gel-purified and 400 ng of the purified  
653 product were used in a random priming reaction containing: 4 Units Klenow fragment  
654 (TAKARA, Japan), 5 µl 10x Klenow reaction buffer, 12 µl Random hexamers (100  
655 µM), 5 µl of 10x DIG DNA labelling Mix (Sigma, USA) and H<sub>2</sub>O to 50 µl.

#### 656 **Protein extraction and Western blot**

657 Approximately 100 µg of leaf tissue were harvested, frozen into liquid nitrogen and  
658 grounded into 100 µl of extraction Laemmli buffer (62.5 mM Tris-HCl pH 7.4, 100 mM  
659 Dithiothreitol (DTT), 2% sodium-dodecyl sulfate (SDS), 0,001% Bromophenol blue  
660 (BPB), and 10% glycerol). The resulting homogenate was centrifuged at 20000 g for 10  
661 min at 4°C. Soluble supernatant was centrifuged again in a fresh tube to ensure absence  
662 of insoluble debris. Protein concentration was determined by the Bio-Rad protein assay  
663 (Bio-Rad, USA). Ten micrograms of each protein sample, unless otherwise stated, were  
664 resolved on 10-12% acrylamide SDS-PAGE gels (Mini protean, Bio-Rad, USA) and  
665 transferred onto nitrocellulose membranes (Immobilon-P, Millipore, USA), using the  
666 Semi-Dry Transfer System (Bio-Rad, USA) during 1h at 25V. Western blots for  
667 immunodetection of GFP (Santa Cruz Biotechnology, USA), Tubulin (Abiocode, USA),  
668 MPKs (Cell Signaling Biotechnology, USA), or anti-PR [83] were carried out using  
669 standard methods, with a 1:600 dilution of primary anti-GFP, 1:1000 for anti-Tubulin,  
670 1:5000 for anti-MPKs and 1:5000 for anti-PR1. For secondary antibodies, 1:10000  
671 dilution of a secondary Anti-Rabbit antibody (SIGMA, USA), and 1:80000 dilution for  
672 Anti-Mouse antibody (SIGMA, USA) were used. Membranes were developed using the  
673 Bio-Rad Clarity Western ECL Substrate (Bio-Rad, USA) following instructions from  
674 the manufacturer.

675

## 676 **Bacterial assays**

677 Bacterial *in planta* assays were carried out using *P. syringae* pv. tomato DC3000 [84] or  
678 a derivative carrying a plasmid constitutively expressing avirulence effector AvrPt2  
679 [85]. Colonies from Lysogenic Broth (LB) medium [86] plates incubated for 2 days at  
680 28°C. Bacterial plant inoculations for RT-*q*PCR or semi-quantitative PCR analysis of  
681 inoculated leaf tissue were carried out using a 10 mM MgCl<sub>2</sub> bacterial suspension at  
682 5x10<sup>7</sup> colony forming unit per ml (cfu/ml) to pressure-infiltrate *Arabidopsis* adult  
683 leaves using a needleless syringe. Inoculations for bacterial proliferation assays were  
684 carried out using bacterial colonies obtained as above but infiltrating leaves with  
685 bacterial suspensions at 5x10<sup>4</sup> cfu/ml. In these assays, 4 days post inoculation (dpi)  
686 three inoculated leaves per plant were collected and one leaf disk of 10 mm diameter  
687 obtained from each that were grinded together into 10 mM MgCl<sub>2</sub> to generate a  
688 biological replicate. Serial dilutions were then plated onto LB plates (supplemented  
689 with cycloheximide at 2 µg/ml to prevent fungal contamination), which were incubated  
690 for 2 days at 28°C to calculate cfu/cm<sup>2</sup>.

691 For transient expression assays in *N. benthamiana*, 4-5 weeks old plants were infiltrated  
692 with an *Agrobacterium tumefaciens* (GV3101 or C58C1 strains) [87] carrying the  
693 corresponding binary plasmids (**Table S4**). Inoculations were carried out using  
694 saturated LB 28°C cultures (and the corresponding antibiotic at the following  
695 concentration: 50 µg/ml kanamycin, 50 µg/ml rifampicin, 20 µg/ml gentamycin, or 5  
696 µg/ml tetracycline), diluted into infiltration medium (10 mM MES (SIGMA, USA), 10  
697 mM MgCl<sub>2</sub>, 150 µM 3',5'-Dimethoxy-4'-hydroxyacetophenone (acetosyringone;  
698 SIGMA, USA) at a 23.7x10<sup>8</sup> cfu/ml (OD<sub>600</sub>=0.75) or infiltration medium (mock  
699 controls). Samples were taken 2 to 3 days post-inoculation.

700

## 701 **Generating *Arabidopsis* transgenic lines**

702 To generate transgenic lines (**Table S5**), 5 mL of LB inoculated with *A. tumefaciens*  
703 was incubated overnight at 28°C with agitation, and 500 µL of it used to inoculate 100  
704 mL of LB supplemented with the corresponding antibiotic that was also incubated at  
705 28°C with agitation for 24 h. The resulting *A. tumefaciens* culture was centrifuged at  
706 5500 g for 10 min. After discarding the supernatant, pellets were suspended into 50 mL  
707 of H<sub>2</sub>O containing sucrose (50 g/L) and Silwet (50 µl/L; UNIROYAL CHEMICAL,



708 UK). These suspensions were used for floral dipping to generate the *A. thaliana*  
709 transgenic lines [88]. Putative transformants were selected into plates of MS  
710 supplemented with Km (50 µg/ml) or hygromycin (40 µg/ml), and the presence of the  
711 transgen confirmed by PCR as described above.

712

### 713 **Eliciting basal plant defense responses**

714 To elicit basal plant responses, either a 100 nM solution of flg22 immunogenic flagellin  
715 peptide (GenScript), or a 0.2% solution of chitin (method2 from [89]), were needless  
716 syringe-infiltrated into adult plant leaves. Each assay included plants infiltrated with  
717 water as mock treated control, to discard differences observed were caused by pressure  
718 infiltration-associated mechanical damage. All infiltrated tissues were harvested,  
719 immediately frozen in liquid nitrogen at the indicated time points after treatment, and  
720 stored at -80°C until their use in the subsequent assays.

721

### 722 **MAPK activation assays**

723 For MAPK activation assays, *A. thaliana* seedlings (4 per sample) were grown in MS  
724 plates at 21°C with a photoperiod of 8h light/16h darkness and a light intensity of 200  
725 µmol/m<sup>2</sup>/s. Twelve-days-old seedlings were transferred into liquid MS and maintained  
726 there for 24 h. Seedlings were then transferred into 12-well plates containing a 100 nM  
727 solution of flg22, and samples were collected and frozen into liquid nitrogen at the  
728 indicated times. Frozen samples were grounded and proteins extracted in a buffer  
729 containing 100 mM Tris-HCl, 150 mM NaCl and 1x Halt Phosphatase Inhibitor  
730 Cocktail (Thermo Fisher Scientific, USA). Extracted proteins were mixed with a 3x  
731 Laemmli buffer (2% SDS, 10% glycerol, 100 mM DTT, 0.001% BPB and 0.0625 M  
732 Tris-HCL) loaded and separated into a 12% SDS-PAGE, and then were transferred onto  
733 nitrocellulose membrane as describe above. Finally, membranes were incubated with  
734 the antibody against Phospho-p44/42 MAPK (Erk1/2) (Thr202/Tyr204) (D13.14.4E)  
735 XP® (Cell Signaling Technology, USA). As a loading control membranes were  
736 incubated with anti-tubulin antibody (Abiocode, USA).

737

### 738 **ROS quantification**

739 *Arabidopsis* plants of the indicated genotypes were grown 2-3 weeks on soil during 2-3  
740 weeks as described above. Two leaf disks were taken per plant with a cork borer  
741 (diameter=3.8 mm), transferred into a 96-well plate containing 100 µl of water, and

742 incubated for 24 hours at room temperature. The next day, water was removed and  
743 replaced by 100  $\mu$ l of the assay solution: 17  $\mu$ g/mL Luminal (Sigma-A8511, USA), 10  
744  $\mu$ g/ml Horseradish peroxidase (HRP) (Sigma-P6782, USA), 100 nM flg22 (see above)  
745 and water. Light emission was measured immediately in a GloMax 96 Microplate  
746 Luminometer (Promega, USA). At least 16 leaf disks were taken by treatment ( $n \geq 16$ ).  
747

## 748 **Bioinformatic analysis**

749 Raw files were obtained from Sequence Read Archive (NCBI). These files were  
750 converted to fastq files using the SRA toolkit (fastq-dump; [http://ncbi.github.io/sra-](http://ncbi.github.io/sra-tools/)  
751 [tools/](http://ncbi.github.io/sra-tools/)), and quality filtered with removal of adapter content using Trimmomatic [90].  
752 Afterwards, quality was confirmed using FASTQC (Simon Andrews,  
753 [bioinformatics.babraham.ac.uk/projects/fastqc/](http://bioinformatics.babraham.ac.uk/projects/fastqc/)), and the reads mapped against the *A.*  
754 *thaliana* genome (TAIR 10) using Bowtie [91] with no mismatch allowed ( $-v 0$  mode)  
755 (**Fig. 4B and 7**), except for AGO1 and AGO2 libraries ( $-v 1$  mode) (**Fig. 1E and Fig.**  
756 **8B-D**). SAM files were converted to BAM, sorted and indexed using samtools [92].  
757 Mapping of the reads was visualized using IGV browser [93]. Numbers of reads  
758 mapped per feature of the *A. thaliana* genome were estimated using HTSeq (htseq-  
759 count; [94]) and normalized as number of reads mapping to the feature per ten millions  
760 of total reads mapped to the entire genome (RPTM method). The AGO1 and AGO2 IP  
761 libraries used in this study (**Fig. 1E and Fig. 8**) correspond to: GSM2787769,  
762 GSM2787770, GSM3909547 and GSM3909548. For **Fig. 4B and 7** the raw reads were  
763 retrieved from SRP097592 bioproject.

764 MicroRNA and siRNA target prediction (**Fig. 1A, Fig. 4A, Fig. 11, Table S1 and**  
765 **Table S2**) was performed using WMD3 ([http://wmd3.weigelworld.org/cgi-](http://wmd3.weigelworld.org/cgi-bin/webapp.cgi)  
766 [bin/webapp.cgi](http://wmd3.weigelworld.org/cgi-bin/webapp.cgi)) and/or psRNATarget ([41]) with default parameters. To analyze  
767 miRNA825 conservation across different species (**Fig. 1C**), sequences were retrieved  
768 from miRBase [95] or from NCBI (Blastn against the desired genomes with ath-miR825  
769 as a template), aligned using Clustal Omega [96], and logos were generated using  
770 Weblogo [97]. NLRs Protein sequences used in Figure 1B were retrieved from TAIR.  
771 The logo was regenerated as described above.

772 To determine miR825 5p/3p ratios (**Fig. 1D**), raw files were obtained from Sequence  
773 Read Archive (NCBI) under the accession numbers: (SRR2079799, SRR2079800,

774 SRR2079801, SRR2079802, SRR2079803, SRR2079804, SRR2079805, SRR2079806,  
775 SRR2079807, SRR2079808, SRR2079809, SRR2079810, SRR2079811, SRR2079812)  
776 and converted to fastq files as explain above. Then, the number of 5p and 3p reads were  
777 investigated using the “grep” command. Only reads starting with mature miRNA  
778 sequences and containing the adapter sequence immediately after miRNA reads were  
779 used for further analysis. Ratios were calculated for each library, and represented as  
780 miR825-5p/miR825-3p.

781 For Fig. 6A, secondary RNA prediction was carried out using Mfold  
782 (<http://unafold.rna.albany.edu/?q=mfold>) and the precursor was visualized with Varna  
783 (<http://varna.lri.fr/index.php?lang=en&page=home&css=varna>). Secondary and tertiary  
784 structures for the miR8255-p/miR825-3p duplex was predicted using Mfold and MC-  
785 fold/MC-Sym as previously described [53].

786

## 787 **Acknowledgments**

788 We are very grateful to Adela Zumaquero whose work inspired the work reported here.  
789 We also wish to thank Pablo García Vallejo for technical assistance. This work was  
790 supported by project grants from Ministerio de Economía y Competitividad (MINECO,  
791 Spain; BIO2015-64391-R) and Ministerio de Ciencia, Innovación y Universidades  
792 (MCIU, Spain, RTI2018-095069-B-100) awarded to C.R. Beuzón and J. Ruiz-Albert,  
793 and Junta de Andalucía Proyecto Operativo FEDER Andalucía (Spain; UMA18-  
794 FEDERJA-070) to J. Ruiz-Albert and E.R. Bejarano. The work was co-funded by  
795 Fondos Europeos de Desarrollo Regional (FEDER). D. López-Márquez was supported  
796 by an FPU Grant (Predoctoral Fellowship from the Spanish Ministerio de Educación,  
797 Cultura y Deporte; FPU14/04233), Plan Propio Universidad de Málaga (UMA) and  
798 project grant RTI2018-095069-B-100 awarded to C.R. Beuzón and J.Ruiz-Albert. ADE  
799 was funded by a FPU Grant (Predoctoral Fellowship from the Spanish Ministerio de  
800 Ciencia, Innovación y Universidades; FPU17/03520). The work carried out in Ignacio  
801 Rubio-Somoza’s laboratory was funded by FEDER/Agencia Estatal de Investigación  
802 (AEI)/ Ministerio de Ciencia, Innovación y Universidades (MCIU, Spain, RTI2018-  
803 097262-B-I00)/Ministerio de Economía y Competitividad (MINECO, Spain, RYC-  
804 2015-19154 and BFU2014-58361-JIN), with the financial support from the Ministerio  
805 de Economía y Competitividad (Severo Ochoa Programme for Centres of Excellence in

806 R&D 2016-2019, SEV-2015- 0533) and the CERCA Programme/Generalitat de  
807 Catalunya.

808

### 809 **Author Contributions**

810 DLM, ERN, IR-S, JRA, ERB and CRB contributed to the conception of the work and  
811 the experimental design. Data acquisition and primary analysis has been the result of the  
812 work of DLM, ADP, NLP, ERN and JRA, while ALL authors participated into data  
813 interpretation. The paper has been drafted by the combined efforts of DLM, JRA, ERB  
814 and CRB, with the final version settled by ALL authors after critical revision. ALL  
815 authors approved the final submitted version, and agree to be accountable for the  
816 accuracy and integrity of their respective contributions to the work presented in this  
817 paper.

818

### 819 **Figure legends**

820 **Figure 1. MiR825-5p is a candidate regulator of TNLs.** **A** We used WMD3  
821 (Ossowski et al., 2008) and default parameters on Araport11 to predict targets for  
822 MIR825-encoded 21 nt (miR825-3p, formerly miR825) and 22 nt (miR825-5p;  
823 formerly miR825\*). All three predicted targets for 21 nt miR825-3p are shown. Only  
824 the top four predicted targets for 22 nt miR825 are shown. Predicted targets for 22 nt  
825 miR825 are genes encoding Toll/interleukin-1 (TIR), nuclear binding site (NBS) and  
826 leucine-rich repeat (LRR) containing proteins (TIR-NBS-LRR). **B** MiR825-5p sequence  
827 paired with the consensus for 18 TNLs (plus one TIR domain protein) putative targets  
828 from the *Arabidopsis* genome. The logo corresponding to the consensus protein  
829 sequence for miR825-5p target site is shown below (black lines indicates perfect  
830 pairing, grey lines perfect pairing with the most conserved nucleotide, and dots indicate  
831 variable region that allows pairing at the RNA level). **C** Sequence comparisons between  
832 21 and 22 nt miR825 encoded in different brassica species show that 22 nt miRNA825-  
833 5p is conserved to a higher degree than 21 nt miRNA825-3p. **D** Graph shows ratio  
834 between levels of miR825-5p (formerly miR825\*) and miR825-3p (formerly miR825)  
835 in leaf four at different days after emergence in Col-0 plants as stored in public  
836 databases (PRJNA186843). Two replicate experiments are shown. Ratios obtained are  
837 equal (8 days) or higher than 1.0, except in young leaves (4 days) in one of the two  
838 replicates. **E** Graph shows levels of miR825-5p and miR825-3p pulled down as part of

839 AGO1 complexes. Data has been obtained from GSM2787769 and GSM2787770  
840 public databases.

841

842 **Figure 2: Pri-miR825 has a negative impact on PTI.** **A** Sequence of pri-miR825  
843 indicating target for amiR anti825. **B** Plants expressing amiR anti825 display  
844 significantly reduced precursor levels, as well as significantly reduced levels of the  
845 mature forms of miR825-5p and miR825-3p compared to wild type Col-0 plants (WT).  
846 Asterisks indicate results are significantly different from WT plants, as established by a  
847 Student's t-test ( $P < 0.05$ ). Numbers above the bars indicate  $P$  values. Error bars  
848 correspond to standard error. **C** ROS production at different time points after treatment  
849 with 100 nM flg22 of WT or anti825 lines. **D** Western Blot analysis showing levels of  
850 phosphorylated mitogen-activated protein kinases (MPK3, MPK4, MPK6 and MPK11)  
851 after treatment with 100 nM flg22 of wild type (WT) or anti825 lines at three different  
852 time points (0, 10 and 15 days post flg22 treatment). Anti-tubulin was used to  
853 normalize. Numbers below the blot indicates fold-differences between MPK/tubulin  
854 signal ratios calculated using ImageJ (<http://imagej.nih.gov/ij/>) in anti825 lines and the  
855 ratio obtained for WT plants in each time point. **E** Western blot analysis showing PR1  
856 protein levels in WT or anti825 plants after inoculation with  $5 \times 10^7$  colony forming units  
857 (CFU)/ml of *P. syringae* DC3000 expressing effector AvrRpt2 from a plasmid under a  
858 constitutive *nptII* promoter. Samples were taken at 0 or 12 hours post inoculation. Anti-  
859 tubulin was used as loading control. **F** Bacterial multiplication assay in WT or antiR825  
860 lines: Leaves were inoculated by infiltration with a solution of  $5 \times 10^4$  CFU/ml of *P.*  
861 *syringae* DC3000. Samples were taken 4 days post inoculation and plated. Bacterial  
862 counts are shown. Mean values are shown for each plant genotype, although individual  
863 values are also represented. Error bars represent standard error. Mean values marked  
864 with the same letter were not significantly different from each other as established by  
865 Student's t-test ( $P < 0.05$ ).

866

867 **Figure 3. MiR825-5p is a negative regulator of plant immunity against *P. syringae*.**  
868 **A** Left panel shows sequence and hairpin structure of amiR825-5p. A sequence  
869 comparison between miR825-3p and the passenger miRNA generated from this  
870 construct (amiRNA\*) is shown below the hairpin. Center panel shows relative  
871 expression of miR825-5p, while right panel shows bacterial colonization of WT and two  
872 independent lines expressing amiR825-5p (#3 and #12). **B** Left panel shows sequence

873 and structure of the STTM825-5p construct. Right panels show relative expression of  
874 miR825-5p and bacterial colonization of WT and two independent lines expressing  
875 STTM825-5p (#3 and #4). For miR825-5p expression assays, asterisks indicate results  
876 are significantly different from WT plants, as established by a Student's t-test ( $P < 0.05$ ).  
877 Error bars correspond to standard error. Numbers above bars indicate the  $P$  value. For  
878 bacterial colonization assays in **A** and **B**, plants were inoculated by infiltration of a  
879  $5 \times 10^4$  CFU/ml of *P. syringae* DC3000 solution. Samples were taken 4 days post  
880 inoculation and plated. Bacterial counts are shown. Mean values are shown for each  
881 plant genotype, although individual values are also represented. Error bars represent  
882 standard error. Mean values marked with the same letter were not significantly different  
883 from each other as established by Student's t-test ( $P < 0.05$ ).  $P$  values are shown above  
884 the letters.

885

886 **Figure 4. Data mining and regulatory network analysis revealed miR825-5p**  
887 **putative target TNL-encoding AT5G38850 gene as a central hub for TNL gene**  
888 **regulation.** **A** Regulatory network showing all 21 putative targets for miR825-5p as  
889 predicted using WMD3 and default parameters on Araport11. TNL is indicated for the  
890 17 out of these 21 that are annotated as such. Two additional genes encode a truncated  
891 TIR-NBS-LRR and a TIR domain-carrying protein. **B** Graph shows sRNA  
892 accumulation from all NLRs within the *Arabidopsis* genome (data obtained from NCBI:  
893 BioProject SRP097592, WT library). Graph displays number of sRNA (reads per 10  
894 million small RNAs mapped, RTMP) accumulated from each NLR-encoding gene.  
895 Number of sRNA accumulated from *TAS1A* and *TAS3* are provided as reference.

896

897 **Figure 5. TNL-encoding AT5G38850 gene is a target for miR825-5p regulation.** **A**  
898 Graph shows levels of pri-miR825, miR825-5p and *AT5G38850* mRNA in WT *versus*  
899 *dcl1-7* mutant plants. Asterisks indicate results are significantly different from WT  
900 plants, as established by a Student's t-test ( $P < 0.05$ ). Error bars correspond to standard  
901 error. **B** Gene fusion of *AT5G38850* (includes its own 3'-UTR region, exons and  
902 introns) to the Green Fluorescent Protein gene (*GFP*) ORF. The gene fusion is under the  
903 transcriptional control of a 35S constitutive promoter (*wt-AT5G38850*). Modified  
904 version carries mutations making the transcript generated no longer complementary to  
905 miR825-5p, without affecting protein coding (*m-AT5G38850*). **C** Western Blot analysis  
906 using an anti-GFP antibody of *Nicotiana benthamiana* leaves transiently co-expressing

907 either wt-*AT5G38850* or mut-*AT5G38850*, with either miR825-5p or unrelated miR319.  
908 Coomassie blue staining of the membrane is shown as loading control. **D** Accumulation  
909 of endogenous *AT5G38850* transcripts negatively correlated with levels of miR825-5p  
910 in all different genotypes tested. Asterisks indicate results are significantly different  
911 from WT plants, as established by a Student's t-test ( $P < 0.05$ ). Error bars correspond to  
912 standard error.

913

914 **Figure 6. MiRNA825-5p is a putative trigger for phasiRNAs production from**  
915 ***MIST1* transcripts.** **A** Pri-microRNA825 predicted hairpin structure. Secondary  
916 structure was predicted using Mfold and visualized with Varna. MiR825-5p sequence is  
917 indicated in orange. MiR825-3p sequence is indicated in blue. **B** Predicted 3D-structure  
918 for the asymmetric duplex formed between miR825-5p and miR825-5p. Predictions  
919 were done using RNAfold and MC-fold/MC-Sym pipeline. **C** Sequence  
920 complementarity between miR825-5p and its target site in *MIST1*. Sequence matching  
921 the first sRNA that accumulates from this transcript is highlighted. Its position matches  
922 that predicted for the first phasiRNA to be generated after cleavage by RISC-miR825-  
923 5p, between nucleotides 10 and 11 nucleotides. **D** Sequence and length of the sRNA  
924 highlighted in **C**. **E** Screenshot from MPSS showing sRNAs that accumulate from  
925 *MIST1* (*AT5G38850*). **F** Screenshot from MPSS showing the Phasing Analysis for the  
926 region analyzed in **E**. **G** Predicted free energy for hybridization between miR825-5p  
927 and 3' target fragment/ 5' target fragment of *MIST1*. Prediction was done using  
928 UNAFold as previously described by Branscheid and collaborators (2015).

929

930 **Figure 7. Distribution and DCL/ RDR6-dependency of *MIST1*-derived siRNAs.** **A**  
931 IGV screenshots showing sRNAs production from *AT5G38850* genomic region, in wild  
932 type plants (WT), *DCL2* mutant (*dcl2*), *DCL4* mutant (*dcl4*), *DCL24* double mutant  
933 (*dcl24*) and *DCL4/RDR6* double mutant (*dcl4/rdr6*) plants. The dashed line represents  
934 miR825-5p target site. Coverage is indicated in grey, and red and blue are used to  
935 indicate sRNAs generated from either the positive or negative strand, respectively. The  
936 gene model is represented at the bottom. **B** Quantification of sRNAs produced from  
937 *MIST1* as RPTM (Reads Per Ten Millions) in two independent biological replicates  
938 (replicate 1 represented in **A**). **C** Size distribution (as percentage) of sRNAs that map to  
939 *MIST1*. **D** Analysis of first 5' nucleotide (as percentage) present in the sRNAs that map

940 to *MIST1*. In **C** and **D** results from the *dcl4/rdr6* mutant are not represented due to total  
941 absence of sRNAs accumulating from this region.

942

943 **Figure 8. *MIST1*-derived phasiRNAs accumulate according to miR825-5p levels**  
944 **and are loaded onto AGO1 or AGO2 complexes.** **A** SiRNA accumulation from  
945 *MIST1* shown by small RNA Northern blot analysis. Probe used is displayed. U6 and  
946 Syber staining were used to normalize **B** Table shows raw mapped reads for *MIST1*-  
947 derived most abundant phasiRNAs in AGO1/AGO2 pull down experiments.  
948 Corresponding libraries are indicated. Well-established secondary tasiRNAs generated  
949 from *TASI* genes are included as references. **C** Localization within *MIST1* of  
950 phasiRNAs included in B as pulled down with AGO1 or AGO2 complexes. MiR825-5p  
951 target site is included as a reference. **D** IGV screenshot showing sRNAs production  
952 from *MIST1* genomic region that are pulled down with AGO1 and AGO2 complexes.  
953 Corresponding libraries are indicated.

954

955 **Figure 9. MiR825-5p triggers transitivity at *MIST1* target site.** **A** Experimental  
956 design for MIGSS825-5p-TS. MiR825-5p target site from *MIST1* is fused to a 500 bp  
957 fragment of *AGAMOUS* gene and expression of the construct driven by a 35S  
958 constitutive promoter. Recognition by the RISC-miR825-5p complex is expected to  
959 triggers phasiRNAs production from the *AGAMOUS* fragment, which are expected to  
960 to silence the endogenous *AGAMOUS* gene *in trans*. **B** DNA genotyping of plants with  
961 the amiR825-5p (#9), MIGS825-5pTS (#10). **C**. Flower phenotypes for the different  
962 genotypes.

963

964 **Figure 10. Pri-miR825 is transcriptionally down regulated upon PAMP-**  
965 **perception.** **A-D** Semi quantitative RT-PCR show levels of pri-miR825 3 hours: **A**  
966 post-inoculation with  $5 \times 10^7$  CFU/ml of *P. syringae* DC3000. **B** post-treatment with  
967 flg22, **C** post-inoculation of *fls2* mutant plants with,  $5 \times 10^7$  CFU/ml of *P. syringae*  
968 DC3000, and **D** post-treatment with chitin. Accompanying graphs correspond to Image  
969 J quantification of the bands. **E** Time course experiment using RT-*q*PCR to follow  
970 accumulation of pri-miR825 transcripts after flg22 treatment. **F** Time course experiment  
971 using RT-*q*PCR to follow accumulation of endogenous pri-miR825 transcripts and that  
972 of transcripts from the transgene formed by fusion of the AtMIR825 promoter to the  
973 GFP coding sequence, after flg22 treatment in a pMIR825::*GFP* transgenic line. **G**



974 Northern blot analysis of the levels of miR825-5p in sRNA samples taken from adult  
975 leaves 24 hours post-inoculation with either Pto DC3000 (Pto) or the inoculating  
976 solution (mock). **I** Northern blot analysis of the levels of sRNAs produced from the  
977 *MIST1* transcript in sRNA samples taken from adult leaves 24 hours post-inoculation  
978 with either Pto DC3000 (Pto) or the inoculating solution (mock).

979

980 **Figure 11. MiR825-5p predicted regulatory network.** **A** MiR825-5p direct target  
981 genes are shown including *MIST1* as a primary central hub for TNL gene regulation.  
982 Only the top five phasiTNLs in terms of accumulation and AGO1/AGO2 association  
983 are included, as well as their predicted targets. Hits of this phasiTNLs on primary  
984 miR825-5p are also indicated. PhasiTNL4 acts as a secondary hub in this regulatory  
985 network through targeting of the highly conserved TIR3 motif. **B** Domain organization  
986 of a TNL protein with domains and conserved motifs indicated. Alignments of miR825-  
987 5p and phasiTNLs with their respective target sequences are mapped to the  
988 corresponding domains/motifs within the TNL protein.

989

990 **Figure 12. Model of the proposed regulatory network of miR825-5p.** Under basal  
991 conditions, in the absence of a pathogen, miR825-5p silences expression of a number of  
992 TNL genes including *MIST1*. MiR825-5p silencing of *MIST1* leads to the accumulation  
993 of numerous phasiTNLs through the action of RDR6 and DCL4/DCL2. These  
994 phasiTNLs act amplifying silencing of primary target TNL genes and silence in trans  
995 additional TNLs or PHATT (PHasi-Targeted TNL) genes. Upon perception of PAMPs,  
996 perhaps involving SNC1, *MIR825* expression is down regulated, as has been reported  
997 for *RDR6*, leading to activation of TNL expression.

998

999 **Figure S1. SiRNA production from different NLR genes. Images show** screenshots  
1000 from MPSS showing sRNAs that originate from NLR genes in *Arabidopsis* selected  
1001 among those displayed in Fig. 4B for accumulating the highest levels of sRNAs.

1002

1003 **Figure S2: AtmiR825A promoter is active in adult leaves.** **A.** Confocal microscopy  
1004 images showing GFP accumulation in a transgenic line harbouring the reporter gene  
1005 under the control of *AtmiR825* promoter (pMIR825A::GFP-HIS). **B.** Western blot  
1006 analysis using anti-HIS antibody show accumulation of the GFP-HIS reporter fusion  
1007 protein in several transgenic lines harbouring the pMIR825A::GFP-HIS construct. The

|

1008 membrane was stained with Coomassie and used as loading control. Samples for **A** and  
1009 **B** were taken from *Arabidopsis* adult leaves.

1010

1011 **Figure S3: Predicted targets of miR825-5p in *Brassica oleracea*. Upper panels of A**  
1012 **and B:** Screenshots showing the complementarity between miR825-5p and the potential  
1013 targets predicted using psRNATarget. **Lower panels of A and B:** Screenshots showing  
1014 the accumulation of 21/22-nt sRNAs from these potential targets. The most similar gene  
1015 in *Arabidopsis* is indicated.

1016

1017 **Table S1. Extended list of targets for miR825-5p and 3p using two different**  
1018 **prediction software.**

1019 **Table S2. Extended list of primary and secondary targets of the miR825-**  
1020 **5p/MIST1/phasiTNLS predicted network (including a larger number of**  
1021 **phasiTNLS and standard parameters)**

1022 **Table S3. Primers used in this work.**

1023 **Table S4. Plasmids used in this work.**

1024 **Table S5. Transgenic lines generated in this work.**

1025

1026 **References**

1027

- 1028 1. Cui H, Tsuda K, Parker JE. Effector-Triggered Immunity: From Pathogen  
1029 Perception to Robust Defense. *Annu Rev Plant Biol.* 2015 Apr  
1030 29;66(1):487–511.
- 1031 2. Couto D, Zipfel C. Regulation of pattern recognition receptor signalling in  
1032 plants. *Nature Publishing Group. Nature Publishing Group*; 2016 Aug 1;:1–  
1033 16.
- 1034 3. Zhang X, Dodds PN, Bernoux M. What Do We Know About NOD-Like  
1035 Receptors in Plant Immunity? *Annu Rev Phytopathol.* 2017 Aug  
1036 4;55(1):205–29.
- 1037 4. Monaghan J, Zipfel C. Plant pattern recognition receptor complexes at the  
1038 plasma membrane. *Current Opinion in Plant Biology.* Elsevier Ltd; 2012  
1039 Aug 1;15(4):349–57.
- 1040 5. Meyers BC, Kozik A, Griego A, Kuang H, Michelmore RW. Genome-  
1041 Wide Analysis of NBS-LRR–Encoding Genes in *Arabidopsis*. *The Plant*  
1042 *Cell.* 2003 Apr 1;15(4):809–34.

- 1043 6. Jubic LM, Saile S, Furzer OJ, Kasmi El F, Dangl JL. Help wanted: helper  
1044 NLRs and plant immune responses. *Current Opinion in Plant Biology*. 2019  
1045 Aug;50:82–94.
- 1046 7. Wiermer M, Feys BJ, Parker JE. Plant immunity: the EDS1 regulatory  
1047 node. *Current Opinion in Plant Biology*. 2005 Aug;8(4):383–9.
- 1048 8. Wirthmueller L, Zhang Y, Jones JDG, Parker JE. Nuclear Accumulation of  
1049 the Arabidopsis Immune Receptor RPS4 Is Necessary for Triggering  
1050 EDS1-Dependent Defense. *Current Biology*. 2007 Dec;17(23):2023–9.
- 1051 9. García AV, Blanvillain-Baufumé S, Huibers RP, Wiermer M, Li G,  
1052 Gobbato E, et al. Balanced nuclear and cytoplasmic activities of EDS1 are  
1053 required for a complete plant innate immune response. Dangl JL, editor.  
1054 *PLoS Pathog*. 2010 Jul 1;6(7):e1000970.
- 1055 10. Adlung N, Prochaska H, Thieme S, Banik A, Blüher D, John P, et al. Non-  
1056 host Resistance Induced by the *Xanthomonas* Effector XopQ Is Widespread  
1057 within the Genus *Nicotiana* and Functionally Depends on EDS1. *Front*  
1058 *Plant Sci*. 2016 Nov 30;7:10306–16.
- 1059 11. Feys BJ, Moisan LJ, Newman MA, Parker JE. Direct interaction between  
1060 the Arabidopsis disease resistance signaling proteins, EDS1 and PAD4.  
1061 *The EMBO Journal*. 2001 Oct 1;20(19):5400–11.
- 1062 12. Rietz S, Stamm A, Malonek S, Wagner S, Becker D, Medina-Escobar N, et  
1063 al. Different roles of Enhanced Disease Susceptibility1 (EDS1) bound to  
1064 and dissociated from Phytoalexin Deficient4 (PAD4) in Arabidopsis  
1065 immunity. *New Phytol*. John Wiley & Sons, Ltd; 2011 Jul;191(1):107–19.
- 1066 13. Wagner S, Stuttmann J, Rietz S, Guerois R, Brunstein E, Bautor J, et al.  
1067 Structural basis for signaling by exclusive EDS1 heteromeric complexes  
1068 with SAG101 or PAD4 in plant innate immunity. *Cell Host and Microbe*.  
1069 2013 Dec 11;14(6):619–30.
- 1070 14. Cui H, Gobbato E, Kracher B, Qiu J, Bautor J, Parker JE. A core function  
1071 of EDS1 with PAD4 is to protect the salicylic acid defense sector in  
1072 Arabidopsis immunity. *New Phytol*. 2017 Mar;213(4):1802–17.
- 1073 15. Tian D, Traw MB, Chen JQ, Kreitman M, Bergelson J. Fitness costs of R-  
1074 gene-mediated resistance in *Arabidopsis thaliana*. *Nature*. Nature  
1075 Publishing Group; 2003 May 1;423(6935):74–7.
- 1076 16. Korves T, Bergelson J. A novel cost of R gene resistance in the presence of  
1077 disease. *Am Nat*. 2004 Apr;163(4):489–504.
- 1078 17. Karasov TL, Kniskern JM, Gao L, DeYoung BJ, Ding J, Dubiella U, et al.  
1079 The long-term maintenance of a resistance polymorphism through diffuse  
1080 interactions. *Nature*. Nature Publishing Group; 2014 Aug  
1081 28;512(7515):436–40.

- 1082 18. MacQueen A, Sun X, Bergelson J. Genetic architecture and pleiotropy  
1083 shape costs of *Rps2*-mediated resistance in  
1084 *Arabidopsis thaliana*. *Nature Plants*. Nature Publishing  
1085 Group; 2016 Jul 18;2(8):1–8.
- 1086 19. Ariga H, Katori T, Tsuchimatsu T, Hirase T, Tajima Y, Parker JE, et al.  
1087 NLR locus-mediated trade-off between abiotic and biotic stress adaptation  
1088 in *Arabidopsis*. *Nature Plants*. Nature Publishing Group; 2017 May  
1089 26;3(6):17072–8.
- 1090 20. Karasov TL, Chae E, Herman JJ, Bergelson J. Mechanisms to Mitigate the  
1091 Trade-Off between Growth and Defense. *Plant Cell*. 2017 Apr;29(4):666–  
1092 80.
- 1093 21. Axtell MJ. Classification and comparison of small RNAs from plants.  
1094 *Annu Rev Plant Biol*. 2013;64:137–59.
- 1095 22. Bologna NG, Voinnet O. The diversity, biogenesis, and activities of  
1096 endogenous silencing small RNAs in *Arabidopsis*. *Annu Rev Plant Biol*.  
1097 2014;65(1):473–503.
- 1098 23. Zhai J, Jeong DH, De Paoli E, Park S, Rosen BD, Li Y, et al. MicroRNAs  
1099 as master regulators of the plant NB-LRR defense gene family via the  
1100 production of phased, trans-acting siRNAs. *Genes & Development*. 2011  
1101 Dec 7;25(23):2540–53.
- 1102 24. Chen H-M, Chen L-T, Patel K, Li Y-H, Baulcombe DC, Wu S-H. 22-  
1103 Nucleotide RNAs trigger secondary siRNA biogenesis in plants. *Proc Natl*  
1104 *Acad Sci USA*. National Academy of Sciences; 2010 Aug  
1105 24;107(34):15269–74.
- 1106 25. Cuperus JT, Carbonell A, Fahlgren N, Garcia-Ruiz H, Burke RT, Takeda  
1107 A, et al. Unique functionality of 22-nt miRNAs in triggering RDR6-  
1108 dependent siRNA biogenesis from target transcripts in *Arabidopsis*. *Nat*  
1109 *Struct Mol Biol*. Nature Publishing Group; 2010 Jun 18;17(8):997–1003.
- 1110 26. Fei Q, Xia R, Meyers BC. Phased, secondary, small interfering RNAs in  
1111 posttranscriptional regulatory networks. *Plant Cell*. American Society of  
1112 Plant Biologists; 2013 Jul;25(7):2400–15.
- 1113 27. Peragine A, Yoshikawa M, Wu G, Albrecht HL, Poethig RS. SGS3 and  
1114 SGS2/SDE1/RDR6 are required for juvenile development and the  
1115 production of trans-acting siRNAs in *Arabidopsis*. *Genes & Development*.  
1116 Cold Spring Harbor Lab; 2004 Oct 1;18(19):2368–79.
- 1117 28. Vazquez F, Vaucheret H, Rajagopalan R, Lepers C, Gascioli V, Mallory  
1118 AC, et al. Endogenous trans-acting siRNAs regulate the accumulation of  
1119 *Arabidopsis* mRNAs. *Molecular Cell*. 2004 Oct 8;16(1):69–79.
- 1120 29. Allen E, Xie Z, Gustafson AM, Carrington JC. microRNA-directed phasing  
1121 during trans-acting siRNA biogenesis in plants. *Cell*. 2005 Apr  
1122 22;121(2):207–21.

- 1123 30. Yoshikawa M, Peragine A, Park M-Y, Poethig RS. A pathway for the  
1124 biogenesis of trans-acting siRNAs in Arabidopsis. *Genes & Development*.  
1125 Cold Spring Harbor Lab; 2005 Sep 15;19(18):2164–75.
- 1126 31. Montgomery TA, Yoo SJ, Fahlgren N, Gilbert SD, Howell MD, Sullivan  
1127 CM, et al. AGO1-miR173 complex initiates phased siRNA formation in  
1128 plants. *Proc Natl Acad Sci USA*. National Academy of Sciences; 2008 Dec  
1129 23;105(51):20055–62.
- 1130 32. Felippes FF, Weigel D. Triggering the formation of tasiRNAs in  
1131 Arabidopsis thaliana: the role of microRNA miR173. *EMBO Rep*. John  
1132 Wiley & Sons, Ltd; 2009 Mar;10(3):264–70.
- 1133 33. Shivaprasad PV, Chen HM, Patel K, Bond DM, Santos BACM, Baulcombe  
1134 DC. A MicroRNA Superfamily Regulates Nucleotide Binding Site-  
1135 Leucine-Rich Repeats and Other mRNAs. *The Plant Cell*. 2012 Apr  
1136 25;24(3):859–74.
- 1137 34. Boccara M, Sarazin A, Thiébeauld O, Jay F, Voinnet O, Navarro L, et al.  
1138 The Arabidopsis miR472-RDR6 silencing pathway modulates PAMP- and  
1139 effector-triggered immunity through the post-transcriptional control of  
1140 disease resistance genes. Zhou J-M, editor. *PLoS Pathog*. 2014  
1141 Jan;10(1):e1003883.
- 1142 35. Canto-Pastor A, Santos BAMC, Valli AA, Summers W, Schornack S,  
1143 Baulcombe DC. Enhanced resistance to bacterial and oomycete pathogens  
1144 by short tandem target mimic RNAs in tomato. *Proc Natl Acad Sci USA*.  
1145 National Academy of Sciences; 2019 Feb 12;116(7):2755–60.
- 1146 36. Su Y, Li H-G, Wang Y, Li S, Wang H-L, Yu L, et al. Poplar miR472a  
1147 targeting NBS-LRRs is involved in effective defence against the  
1148 necrotrophic fungus *Cytospora chrysosperma*. *Journal of Experimental*  
1149 *Botany*. 2018 Aug 17;121:207–12.
- 1150 37. Rajagopalan R, Vaucheret H, Trejo J, Bartel DP. A diverse and  
1151 evolutionarily fluid set of microRNAs in Arabidopsis thaliana. *Genes &*  
1152 *Development*. 2006 Dec 15;20(24):3407–25.
- 1153 38. Fahlgren N, Howell MD, Kasschau KD, Chapman EJ, Sullivan CM,  
1154 Cumbie JS, et al. High-Throughput Sequencing of Arabidopsis  
1155 microRNAs: Evidence for Frequent Birth and Death of MIRNA Genes.  
1156 Shiu S-H, editor. *PLoS ONE*. 2007 Feb 14;2(2):e219–14.
- 1157 39. Niu D, Xia J, Jiang C, Qi B, Ling X, Lin S, et al. *Bacillus cereus* AR156  
1158 primes induced systemic resistance by suppressing miR825/825\* and  
1159 activating defense-related genes in Arabidopsis. *J Integr Plant Biol*. 2016  
1160 Feb 5;58(4):426–39.
- 1161 40. Wan L, Essuman K, Anderson RG, Sasaki Y, Monteiro F, Chung E-H, et  
1162 al. TIR domains of plant immune receptors are NAD<sup>+</sup>-cleaving enzymes  
1163 that promote cell death. *Science*. American Association for the  
1164 Advancement of Science; 2019 Aug 23;365(6455):799–803.

- 1165 41. Dai X, Zhao PX. psRNATarget: a plant small RNA target analysis server.  
1166 Nucleic Acids Research. 2011 Jul;39(Web Server issue):W155–9.
- 1167 42. Meyers BC, Dickerman AW, Michelmore RW, Sivaramakrishnan S, Sobral  
1168 BW, Young ND. Plant disease resistance genes encode members of an  
1169 ancient and diverse protein family within the nucleotide-binding  
1170 superfamily. The Plant Journal. 1999 Nov;20(3):317–32.
- 1171 43. Zhang Y, Xia R, Kuang H, Meyers BC. The Diversification of Plant NBS-  
1172 LRR Defense Genes Directs the Evolution of MicroRNAs That Target  
1173 Them. Mol Biol Evol. Oxford University Press; 2016 Oct;33(10):2692–  
1174 705.
- 1175 44. Bai J-F, Wang Y-K, Wang P, Duan W-J, Yuan S-H, Sun H, et al.  
1176 Uncovering Male Fertility Transition Responsive miRNA in a Wheat  
1177 Photo-Thermosensitive Genic Male Sterile Line by Deep Sequencing and  
1178 Degradome Analysis. Front Plant Sci. Frontiers; 2017 Aug 8;8:63–21.
- 1179 45. Eamens AL, Smith NA, Curtin SJ, Wang MB, Waterhouse PM. The  
1180 Arabidopsis thaliana double-stranded RNA binding protein DRB1 directs  
1181 guide strand selection from microRNA duplexes. RNA. 2009 Nov  
1182 27;15(12):2219–35.
- 1183 46. Tian Y, Tian Y, Luo X, Zhou T, Huang Z, Liu Y, et al. Identification and  
1184 characterization of microRNAs related to salt stress in broccoli, using high-  
1185 throughput sequencing and bioinformatics analysis. BMC Plant Biol.  
1186 BioMed Central; 2014 Sep 3;14(1):669–13.
- 1187 47. Schwab R, Ossowski S, Riester M, Warthmann N, Weigel D. Highly  
1188 specific gene silencing by artificial microRNAs in Arabidopsis. The Plant  
1189 Cell. American Society of Plant Biologists; 2006 May;18(5):1121–33.
- 1190 48. Ossowski S, Schwab R, Weigel D. Gene silencing in plants using artificial  
1191 microRNAs and other small RNAs. The Plant Journal. 2008 Feb  
1192 4;53(4):674–90.
- 1193 49. L EA, Claire A, A SN, M WP, Ming-Bo W. Efficient Silencing of  
1194 Endogenous MicroRNAs Using Artificial MicroRNAs in Arabidopsis  
1195 thaliana. Molecular Plant. The Authors 2011. All rights reserved; 2011 Jan  
1196 20;4(1):157–70.
- 1197 50. Yan J, Gu Y, Jia X, Kang W, Pan S, Tang X, et al. Effective Small RNA  
1198 Destruction by the Expression of a Short Tandem Target Mimic in  
1199 Arabidopsis. The Plant Cell. 2012 Mar 27;24(2):415–27.
- 1200 51. Vazquez F, Blevins T, Ailhas J, Boller T, Meins F Jr. Evolution of  
1201 Arabidopsis MIR genes generates novel microRNA classes. Nucleic Acids  
1202 Research. 2008 Oct 23;36(20):6429–38.
- 1203 52. Lu C, Kulkarni K, Souret FF, MuthuValliappan R, Tej SS, Poethig RS, et  
1204 al. MicroRNAs and other small RNAs enriched in the Arabidopsis RNA-

- 1205 dependent RNA polymerase-2 mutant. *Genome Research*. 2006  
1206 Oct;16(10):1276–88.
- 1207 53. Manavella PA, Koenig D, Weigel D. Plant secondary siRNA production  
1208 determined by microRNA-duplex structure. *Proc Natl Acad Sci USA*.  
1209 National Acad Sciences; 2012 Feb 14;109(7):2461–6.
- 1210 54. Cai Q, Liang C, Wang S, Hou Y, Gao L, Liu L, et al. The disease resistance  
1211 protein SNC1 represses the biogenesis of microRNAs and phased siRNAs.  
1212 *Nature Communications*. Springer US; 2018 Nov 22;:1–14.
- 1213 55. Branscheid A, Marchais A, Schott G, Lange H, Gagliardi D, Andersen SU,  
1214 et al. SKI2 mediates degradation of RISC 5'-cleavage fragments and  
1215 prevents secondary siRNA production from miRNA targets in Arabidopsis.  
1216 *Nucleic Acids Research*. Oxford University Press; 2015 Oct 12;:gkv1014.
- 1217 56. Gascioli V, Mallory AC, Bartel DP, Vaucheret H. Partially redundant  
1218 functions of Arabidopsis DICER-like enzymes and a role for DCL4 in  
1219 producing trans-acting siRNAs. *Curr Biol*. 2005 Aug 23;15(16):1494–500.
- 1220 57. Henderson IR, Zhang X, Lu C, Johnson L, Meyers BC, Green PJ, et al.  
1221 Dissecting Arabidopsis thaliana DICER function in small RNA processing,  
1222 gene silencing and DNA methylation patterning. *Nat Genet*. 2006 May  
1223 14;38(6):721–5.
- 1224 58. Mi S, Cai T, Hu Y, Chen Y, Hodges E, Ni F, et al. Sorting of Small RNAs  
1225 into Arabidopsis Argonaute Complexes Is Directed by the 5' Terminal  
1226 Nucleotide. *Cell*. 2008 Apr;133(1):116–27.
- 1227 59. Felippes FF de, Wang J-W, Weigel D. MIGS: miRNA-induced gene  
1228 silencing. *Plant J*. 2012 May;70(3):541–7.
- 1229 60. Bowman JL, Smyth DR, Meyerowitz EM. Genes directing flower  
1230 development in Arabidopsis. *The Plant Cell*. American Society of Plant  
1231 Biologists; 1989 Jan;1(1):37–52.
- 1232 61. Drews GN, Bowman JL, Meyerowitz EM. Negative regulation of the  
1233 Arabidopsis homeotic gene AGAMOUS by the APETALA2 product. *Cell*.  
1234 1991 Jun 14;65(6):991–1002.
- 1235 62. Wollmann H, Mica E, Todesco M, Long JA, Weigel D. On reconciling the  
1236 interactions between APETALA2, miR172 and AGAMOUS with the ABC  
1237 model of flower development. *Development*. 2010 Oct 12;137(21):3633–  
1238 42.
- 1239 63. Zhang W, Gao S, Zhou X, Chellappan P, Chen Z, Zhou X, et al. Bacteria-  
1240 responsive microRNAs regulate plant innate immunity by modulating plant  
1241 hormone networks. *Plant Mol Biol*. 2010 Dec 12;75(1-2):93–105.
- 1242 64. Brown JKM, Tellier A. Plant-parasite coevolution: bridging the gap  
1243 between genetics and ecology. *Annu Rev Phytopathol*. 2011;49(1):345–67.

- 1244 65. Moreno-Gómez S, Stephan W, Tellier A. Effect of disease prevalence and  
1245 spatial heterogeneity on polymorphism maintenance in host-parasite  
1246 interactions. *Plant Pathol.* 2013 Sep 24;62:133–41.
- 1247 66. Li F, Pignatta D, Bendix C, Brunkard JO, Cohn MM, Tung J, et al.  
1248 MicroRNA regulation of plant innate immune receptors. *Proc Natl Acad  
1249 Sci USA. National Academy of Sciences*; 2012 Jan 31;109(5):1790–5.
- 1250 67. Horsefield S, Burdett H, Zhang X, Manik MK, Shi Y, Chen J, et al. NAD<sup>+</sup>  
1251 cleavage activity by animal and plant TIR domains in cell death pathways.  
1252 *Science.* 2019 Aug 23;365(6455):793–9.
- 1253 68. Kelley LA, Mezulis S, Yates CM, Wass MN, Sternberg MJE. The Phyre2  
1254 web portal for protein modeling, prediction and analysis. *Nat Protoc.*  
1255 *Nature Publishing Group*; 2015 Jun;10(6):845–58.
- 1256 69. Hyun K-G, Lee Y, Yoon J, Yi H, Song J-J. Crystal structure of *Arabidopsis*  
1257 *thaliana* SNC1 TIR domain. *Biochemical and Biophysical Research  
1258 Communications.* 2016 Dec 2;481(1-2):146–52.
- 1259 70. Zhang X, Bernoux M, Bentham AR, Newman TE, Ve T, Casey LW, et al.  
1260 Multiple functional self-association interfaces in plant TIR domains. *Proc  
1261 Natl Acad Sci USA. National Academy of Sciences*; 2017 Mar  
1262 7;114(10):E2046–52.
- 1263 71. Nimma S, Ve T, Williams SJ, Kobe B. Towards the structure of the TIR-  
1264 domain signalosome. *Current Opinion in Structural Biology.* 2017  
1265 Apr;43:122–30.
- 1266 72. Wang J, Hu M, Wang J, Qi J, Han Z, Wang G, et al. Reconstitution and  
1267 structure of a plant NLR resistosome conferring immunity. *Science.* 2019  
1268 Apr 5;364(6435):eaav5870.
- 1269 73. Lewis JD, Wu R, Guttman DS, Desveaux D. Allele-specific virulence  
1270 attenuation of the *Pseudomonas syringae* HopZ1a type III effector via the  
1271 *Arabidopsis* ZAR1 resistance protein. Copenhaver GP, editor. *PLoS Genet.*  
1272 *Public Library of Science*; 2010 Apr 1;6(4):e1000894.
- 1273 74. Wang G, Roux B, Feng F, Guy E, Li L, Li N, et al. The Decoy Substrate of  
1274 a Pathogen Effector and a Pseudokinase Specify Pathogen-Induced  
1275 Modified-Self Recognition and Immunity in Plants. *Cell Host and Microbe.*  
1276 2015 Sep 9;18(3):285–95.
- 1277 75. Seto D, Koulena N, Lo T, Menna A, Guttman DS, Desveaux D. Expanded  
1278 type III effector recognition by the ZAR1 NLR protein using ZED1-related  
1279 kinases. *Nature Plants. Nature Publishing Group*; 2017 Mar 13;3(4):17027–  
1280 4.
- 1281 76. Nie P, Chen C, Yin Q, Jiang C, Guo J, Zhao H, et al. Function of miR825  
1282 and miR825\* as Negative Regulators in *Bacillus cereus* AR156-elicited  
1283 Systemic Resistance to *Botrytis cinerea* in *Arabidopsis thaliana*. *IJMS.*  
1284 *Multidisciplinary Digital Publishing Institute*; 2019 Oct;20(20):5032–21.



- 1285 77. Lunardon A, Johnson NR, Hagerott E, Phifer T, Polydore S, Coruh C, et al.  
1286 Integrated annotations and analyses of small RNA-producing loci from 47  
1287 diverse plants. 2019 Sep 3;14:e0212746–39.
- 1288 78. Flor HH. The Complementary Genic Systems in Flax and Flax Rust.  
1289 Elsevier; 1956. pp. 29–54. (Advances in Genetics; vol. 8).
- 1290 79. Laflamme B, Dillon MM, Martel A, Almeida RND, Desveaux D, Guttman  
1291 DS. The pan-genome effector-triggered immunity landscape of a host-  
1292 pathogen interaction. *Science*. American Association for the Advancement  
1293 of Science; 2020 Feb 14;367(6479):763–8.
- 1294 80. Livak KJ, Schmittgen TD. Analysis of Relative Gene Expression Data  
1295 Using Real-Time Quantitative PCR and the  $2^{-\Delta\Delta CT}$  Method. *Methods*.  
1296 2001 Dec;25(4):402–8.
- 1297 81. Varkonyi-Gasic E. Stem-Loop qRT-PCR for the Detection of Plant  
1298 microRNAs. In: *MicroRNAs in Development*. Boston, MA: Springer US;  
1299 2016. pp. 163–75. (Methods in Molecular Biology; vol. 1456).
- 1300 82. Tomassi AH, Gagliardi D, Cambiagno DA, Manavella PA. Nonradioactive  
1301 Detection of Small RNAs Using Digoxigenin-Labeled Probes. *MicroRNAs*  
1302 *in Development*. New York, NY: Springer New York; 2017;1640(18):199–  
1303 210.
- 1304 83. Wang D, Weaver ND, Kesarwani M, Dong X. Induction of protein  
1305 secretory pathway is required for systemic acquired resistance. *Science*.  
1306 American Association for the Advancement of Science; 2005 May  
1307 13;308(5724):1036–40.
- 1308 84. Cuppels DA. Generation and Characterization of Tn5 Insertion Mutations  
1309 in *Pseudomonas syringae* pv. tomato. *Appl Environ Microbiol*. American  
1310 Society for Microbiology (ASM); 1986 Feb;51(2):323–7.
- 1311 85. Macho AP, Ruiz-Albert J, Tornero P, Beuzón CR. Identification of new  
1312 type III effectors and analysis of the plant response by competitive index.  
1313 *Molecular Plant Pathology*. John Wiley & Sons, Ltd; 2009 Jan;10(1):69–  
1314 80.
- 1315 86. BERTANI G. Studies on lysogenesis. I. The mode of phage liberation by  
1316 lysogenic *Escherichia coli*. *Journal of Bacteriology*. American Society for  
1317 Microbiology (ASM); 1951 Sep;62(3):293–300.
- 1318 87. Deblaere R, Bytebier B, De Greve H, Deboeck F, Schell J, Van Montagu  
1319 M, et al. Efficient octopine Ti plasmid-derived vectors for *Agrobacterium*-  
1320 mediated gene transfer to plants. *Nucleic Acids Research*. 1985 Jul  
1321 11;13(13):4777–88.
- 1322 88. Clough SJ, Bent AF. Floral dip: a simplified method for *Agrobacterium*-  
1323 mediated transformation of *Arabidopsis thaliana*. *The Plant Journal*. John  
1324 Wiley & Sons, Ltd (10.1111); 1998 Dec;16(6):735–43.

- 1325 89. Souza CP, Burbano-Rosero EM, Almeida BC, Martins GG, Albertini LS,  
1326 Rivera ING. Culture medium for isolating chitinolytic bacteria from  
1327 seawater and plankton. *World J Microbiol Biotechnol.* 2009 Jun  
1328 28;25(11):2079–82.
- 1329 90. Bolger AM, Lohse M, Usadel B. Trimmomatic: a flexible trimmer for  
1330 Illumina sequence data. *Bioinformatics.* 2014 Aug 1;30(15):2114–20.
- 1331 91. Langmead B, Trapnell C, Pop M, Salzberg SL. Ultrafast and memory-  
1332 efficient alignment of short DNA sequences to the human genome. *Genome*  
1333 *Biol. BioMed Central*; 2009;10(3):R25–10.
- 1334 92. Li H, Handsaker B, Wysoker A, Fennell T, Ruan J, Homer N, et al. The  
1335 Sequence Alignment/Map format and SAMtools. *Bioinformatics.* 2009  
1336 Aug 15;25(16):2078–9.
- 1337 93. Robinson JT, Thorvaldsdóttir H, Winckler W, Guttman M, Lander ES,  
1338 Getz G, et al. Integrative genomics viewer. *Nat Biotechnol. Nature*  
1339 *Publishing Group*; 2011 Jan;29(1):24–6.
- 1340 94. Anders S, Pyl PT, Huber W. HTSeq--a Python framework to work with  
1341 high-throughput sequencing data. *Bioinformatics.* 2015 Jan 15;31(2):166–  
1342 9.
- 1343 95. Griffiths-Jones S, Grocock RJ, van Dongen S, Bateman A, Enright AJ.  
1344 miRBase: microRNA sequences, targets and gene nomenclature. *Nucleic*  
1345 *Acids Research.* 2006 Jan 1;34(Database issue):D140–4.
- 1346 96. Madeira F, Park YM, Lee J, Buso N, Gur T, Madhusoodanan N, et al. The  
1347 EMBL-EBI search and sequence analysis tools APIs in 2019. *Nucleic*  
1348 *Acids Research.* 2019 Jul 2;47(W1):W636–41.
- 1349 97. Crooks GE, Hon G, Chandonia J-M, Brenner SE. WebLogo: a sequence  
1350 logo generator. *Genome Research. Cold Spring Harbor Lab*; 2004  
1351 Jun;14(6):1188–90.

Figure 1

A

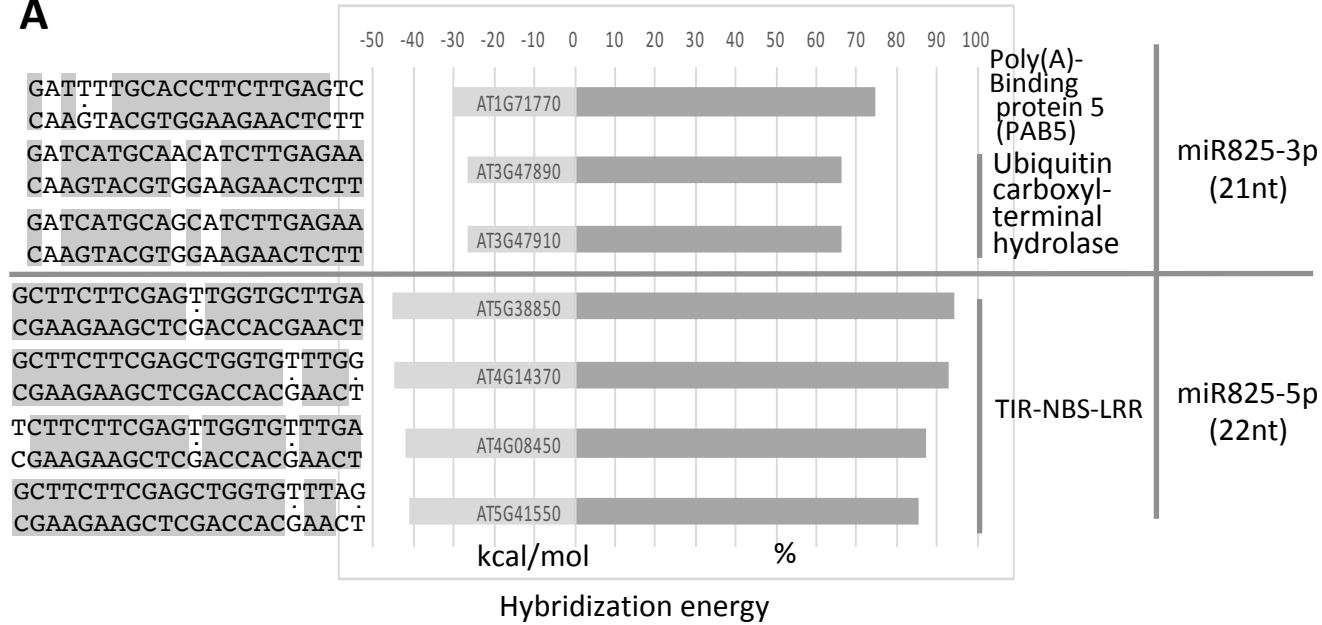

B

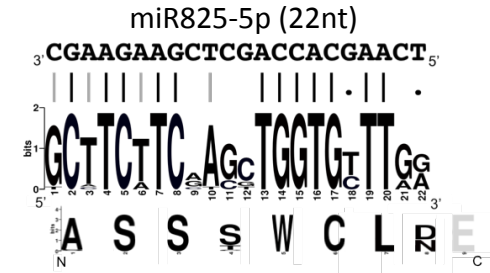

D

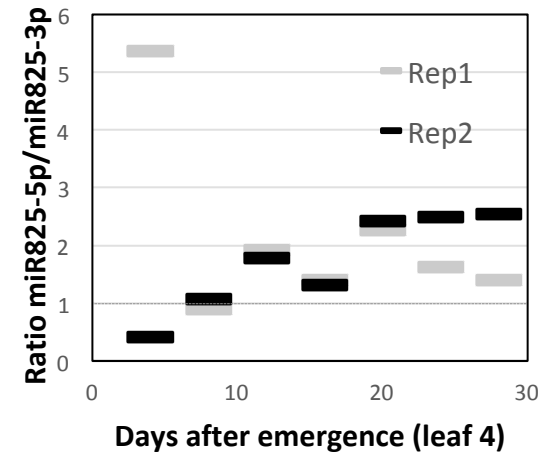

C

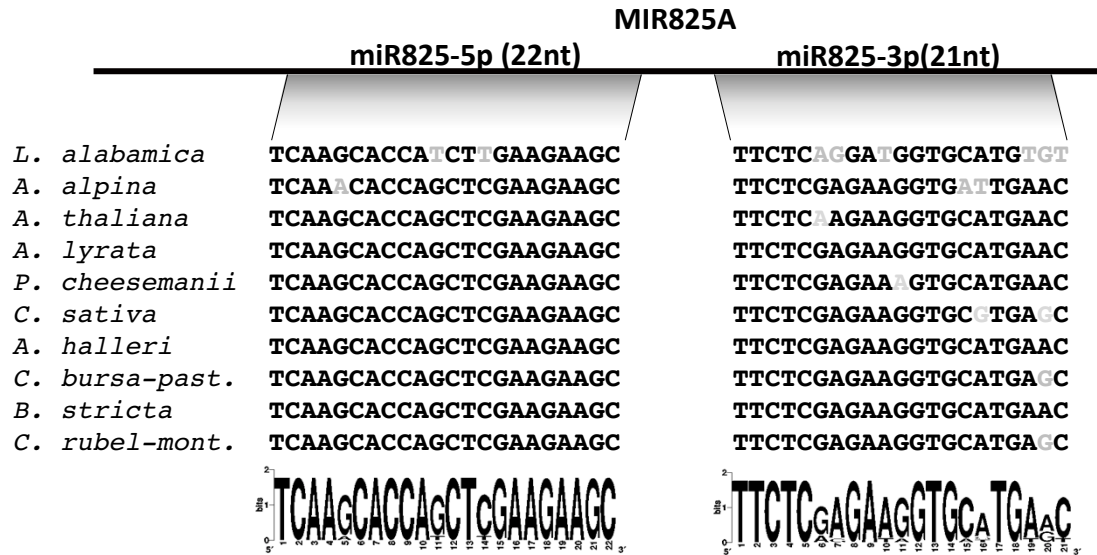

E

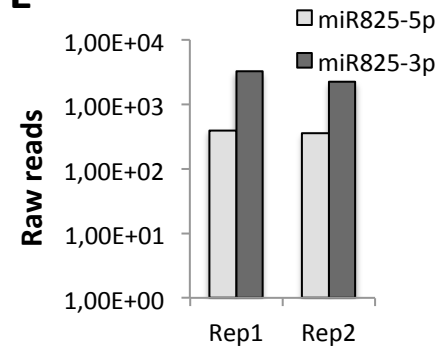

**Figure 2**

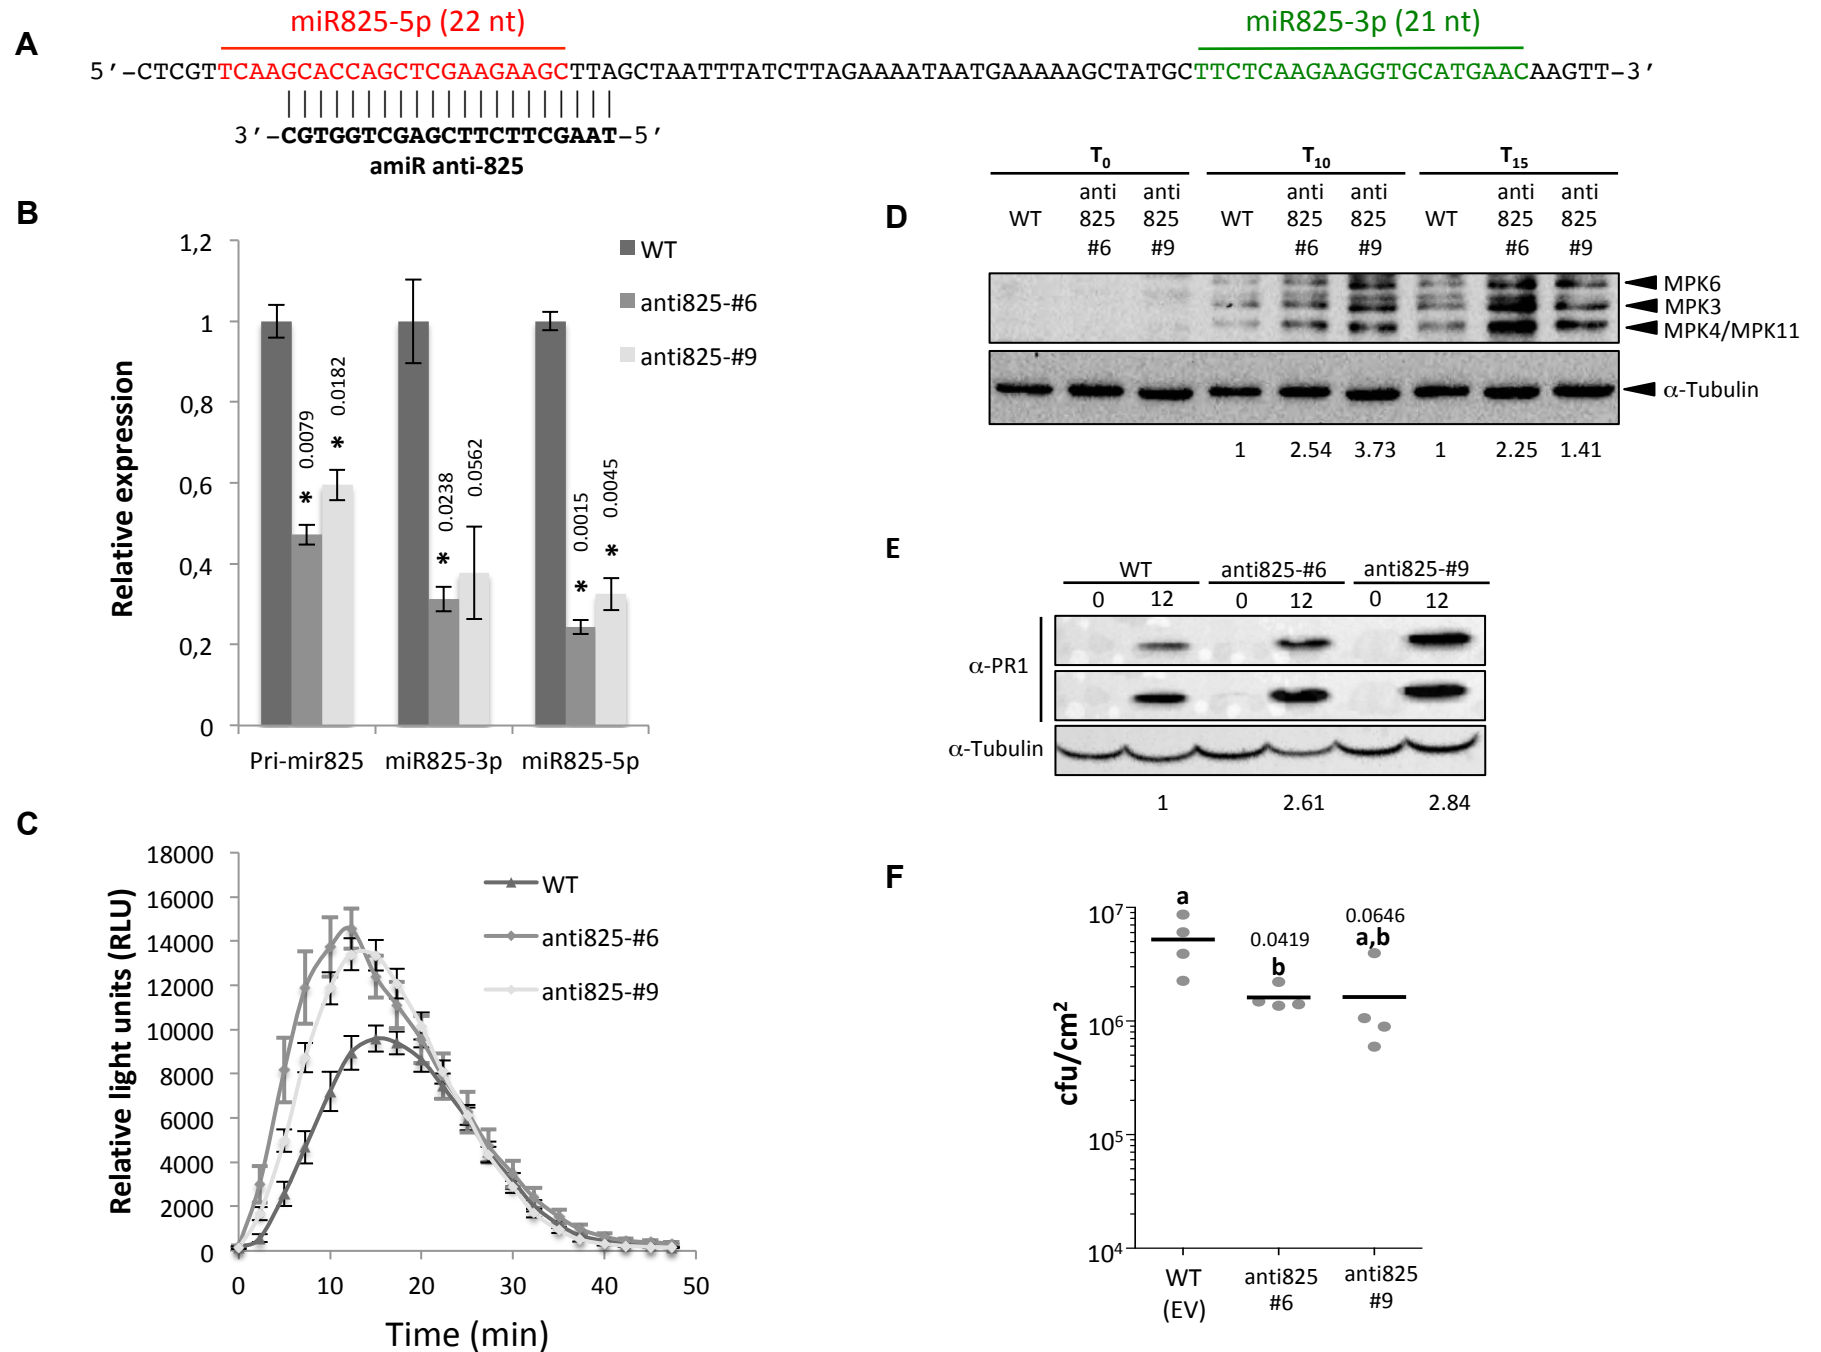

**Figure 3**

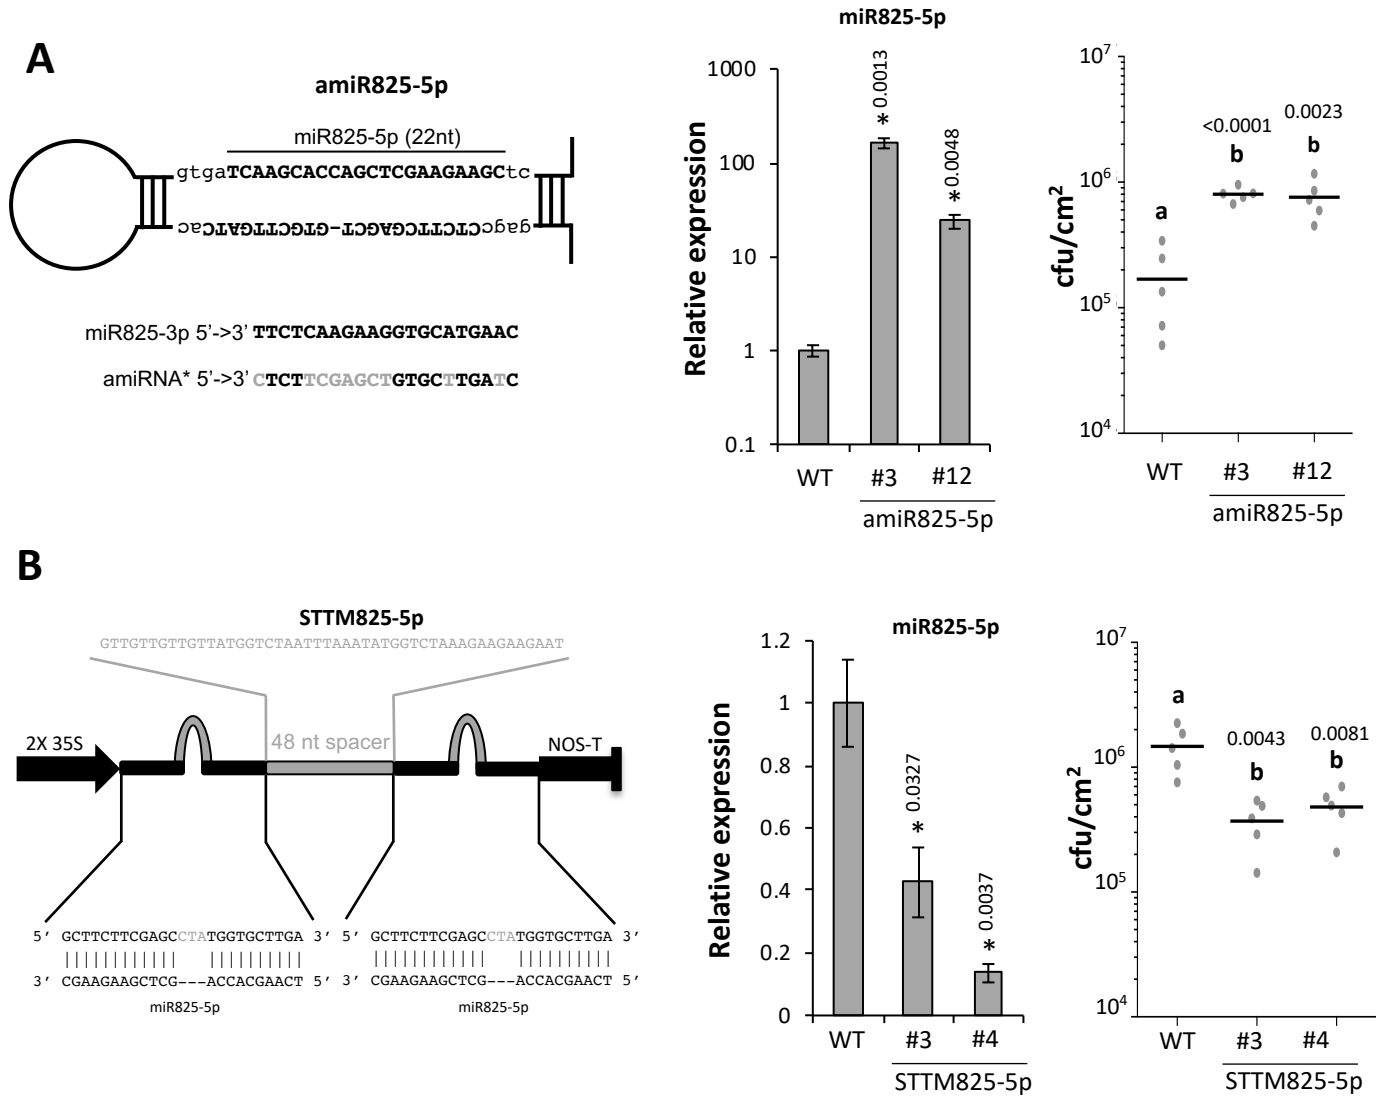

# Figure 4

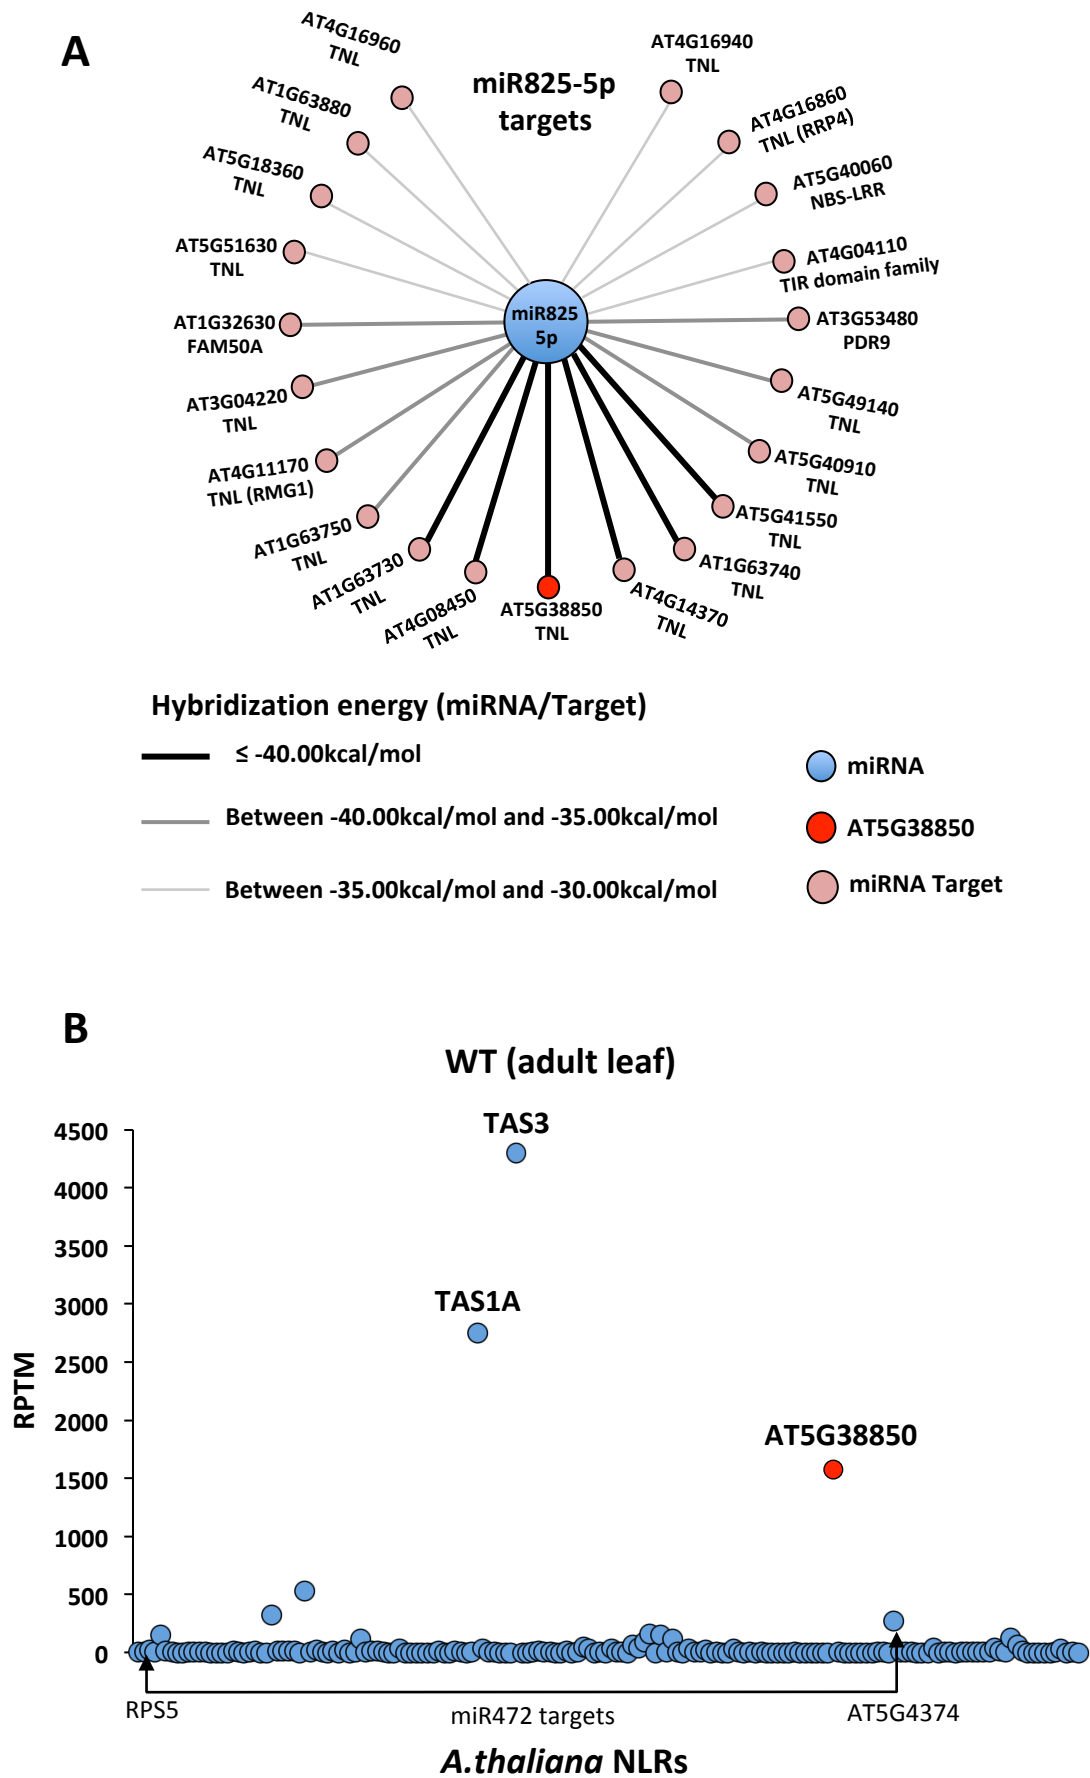

# Figure 5

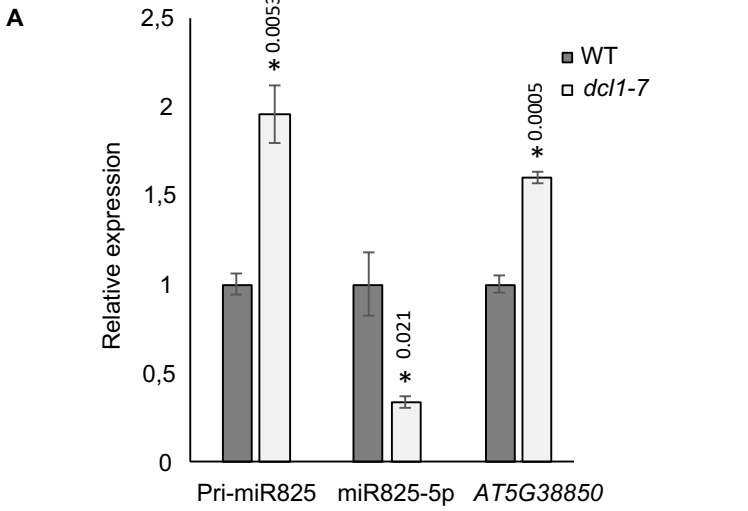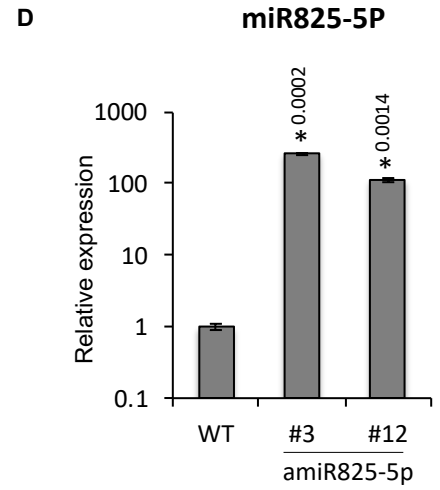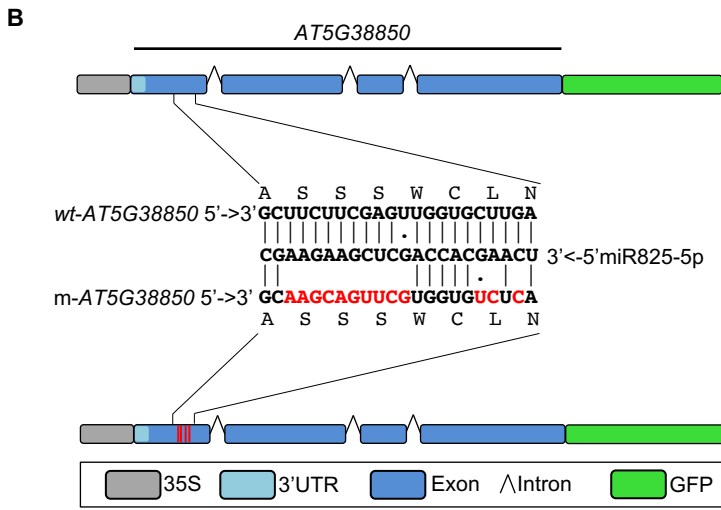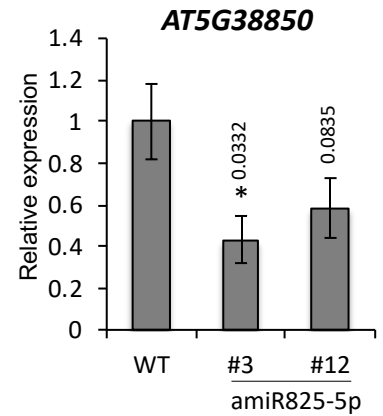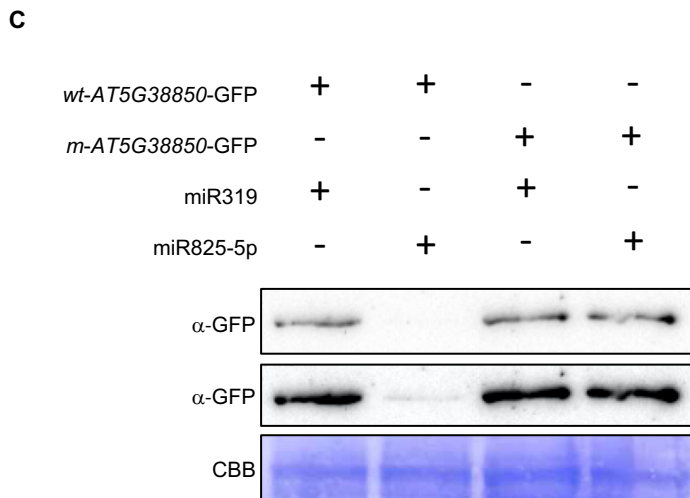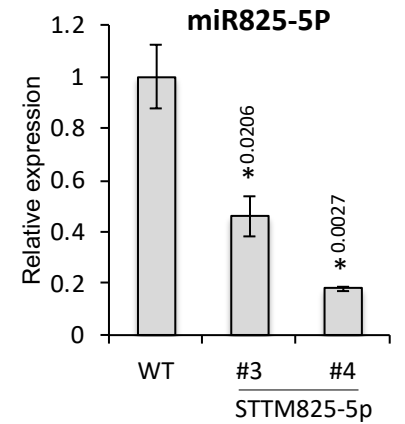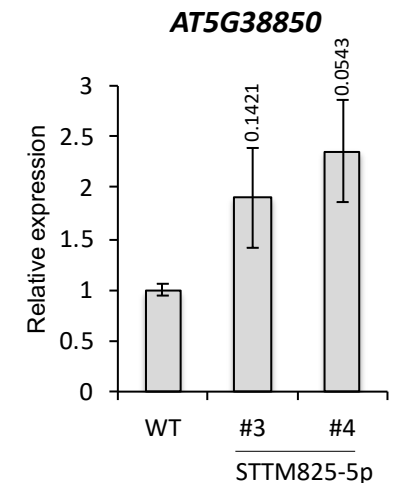

**Figure 6**

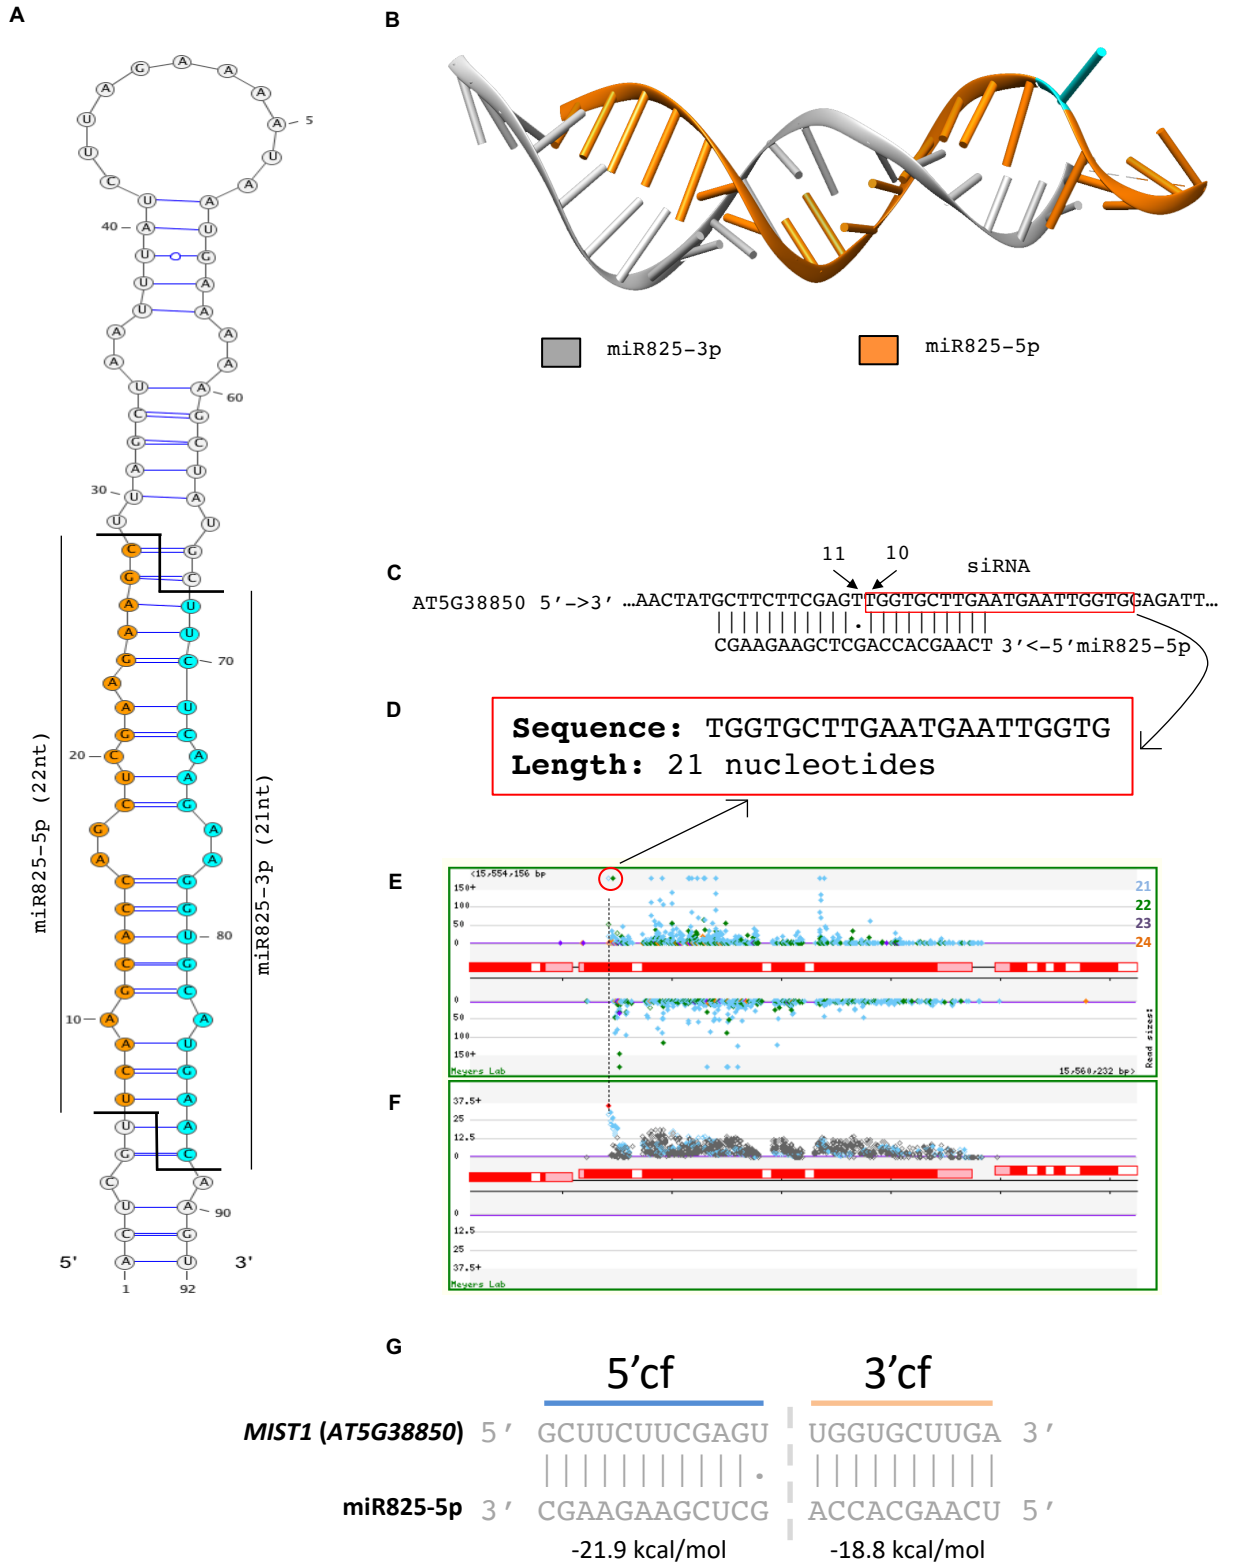



# Figure 7

A

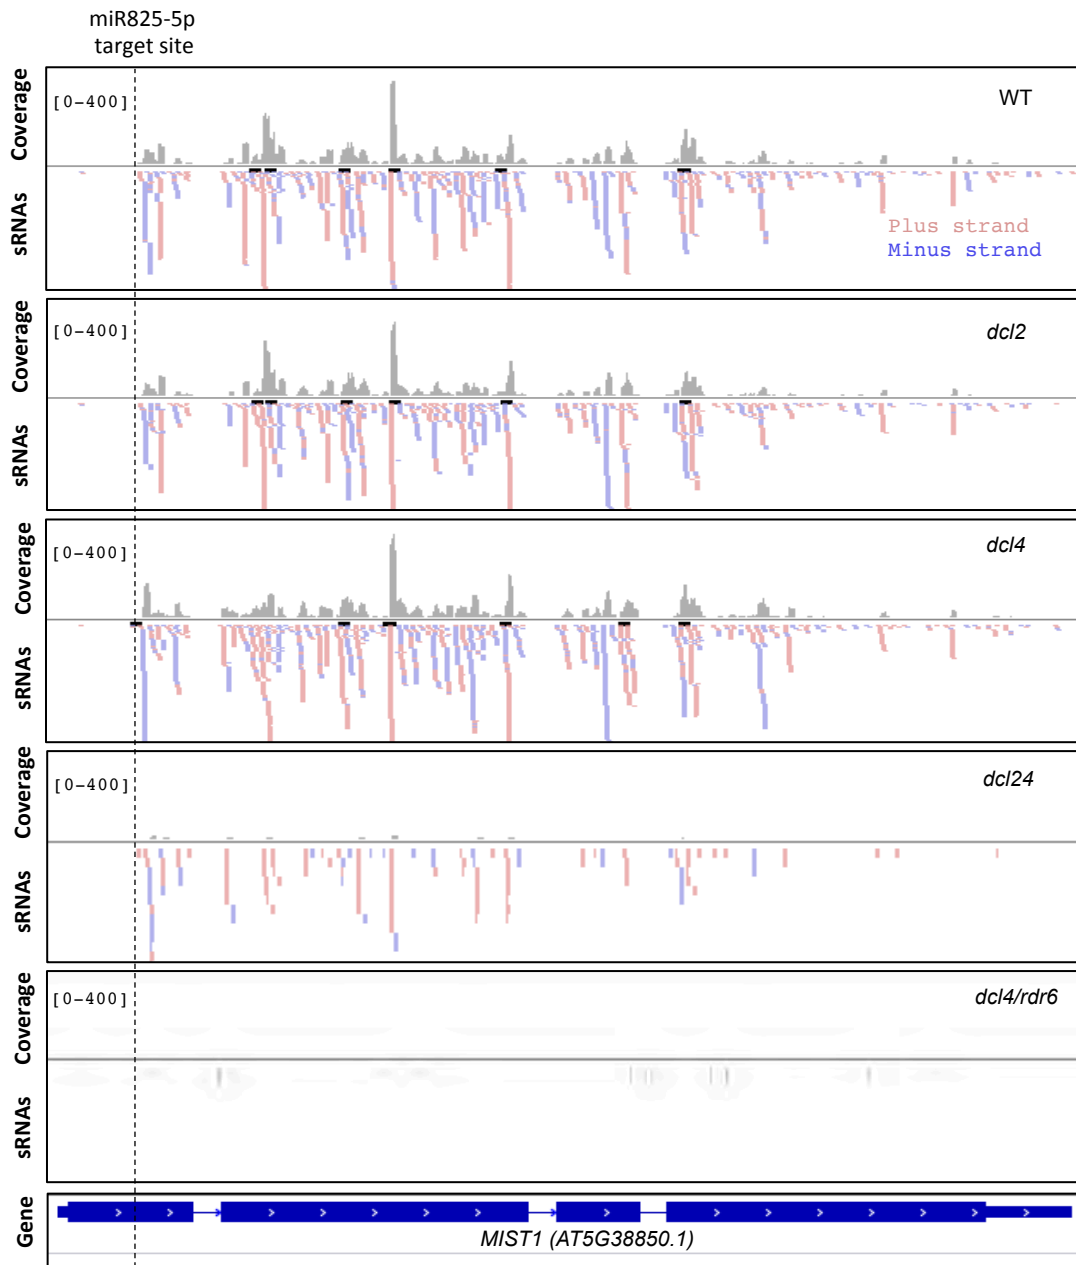

B

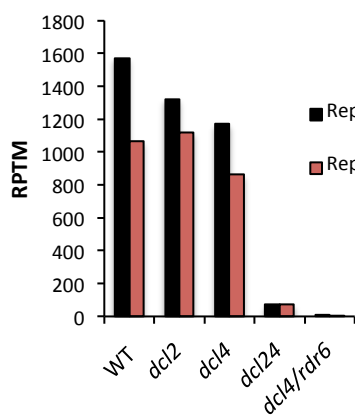

C

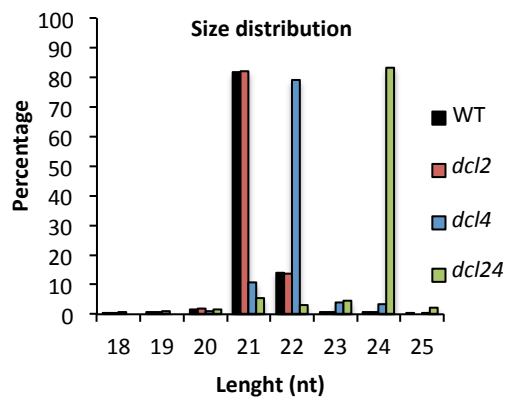

D

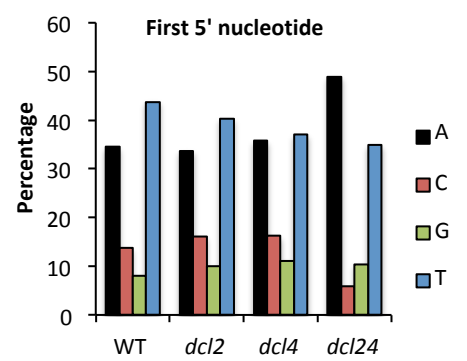

**Figure 8**

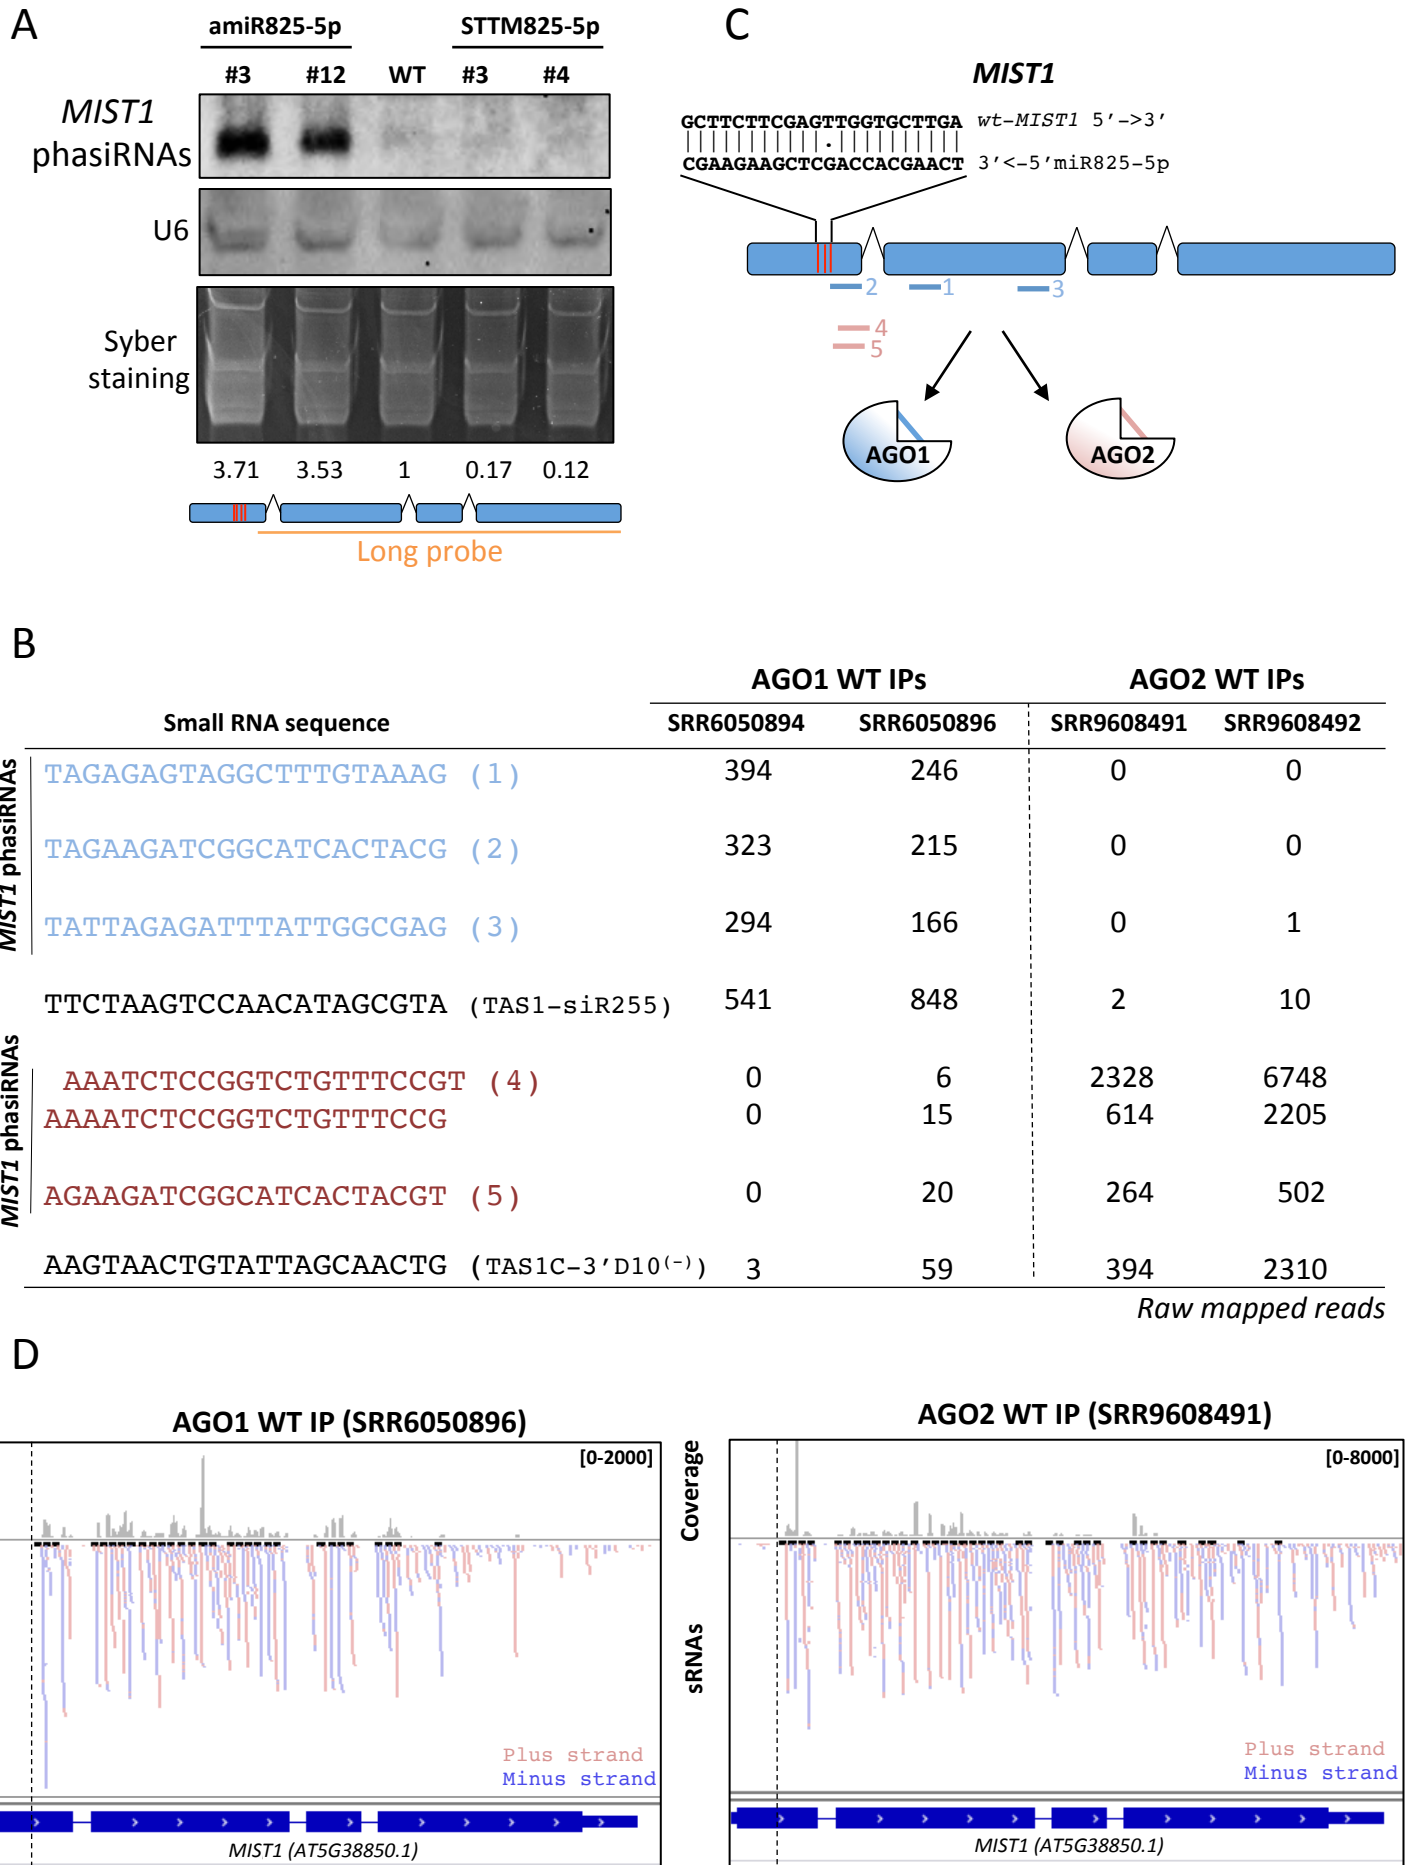

**Figure 9**

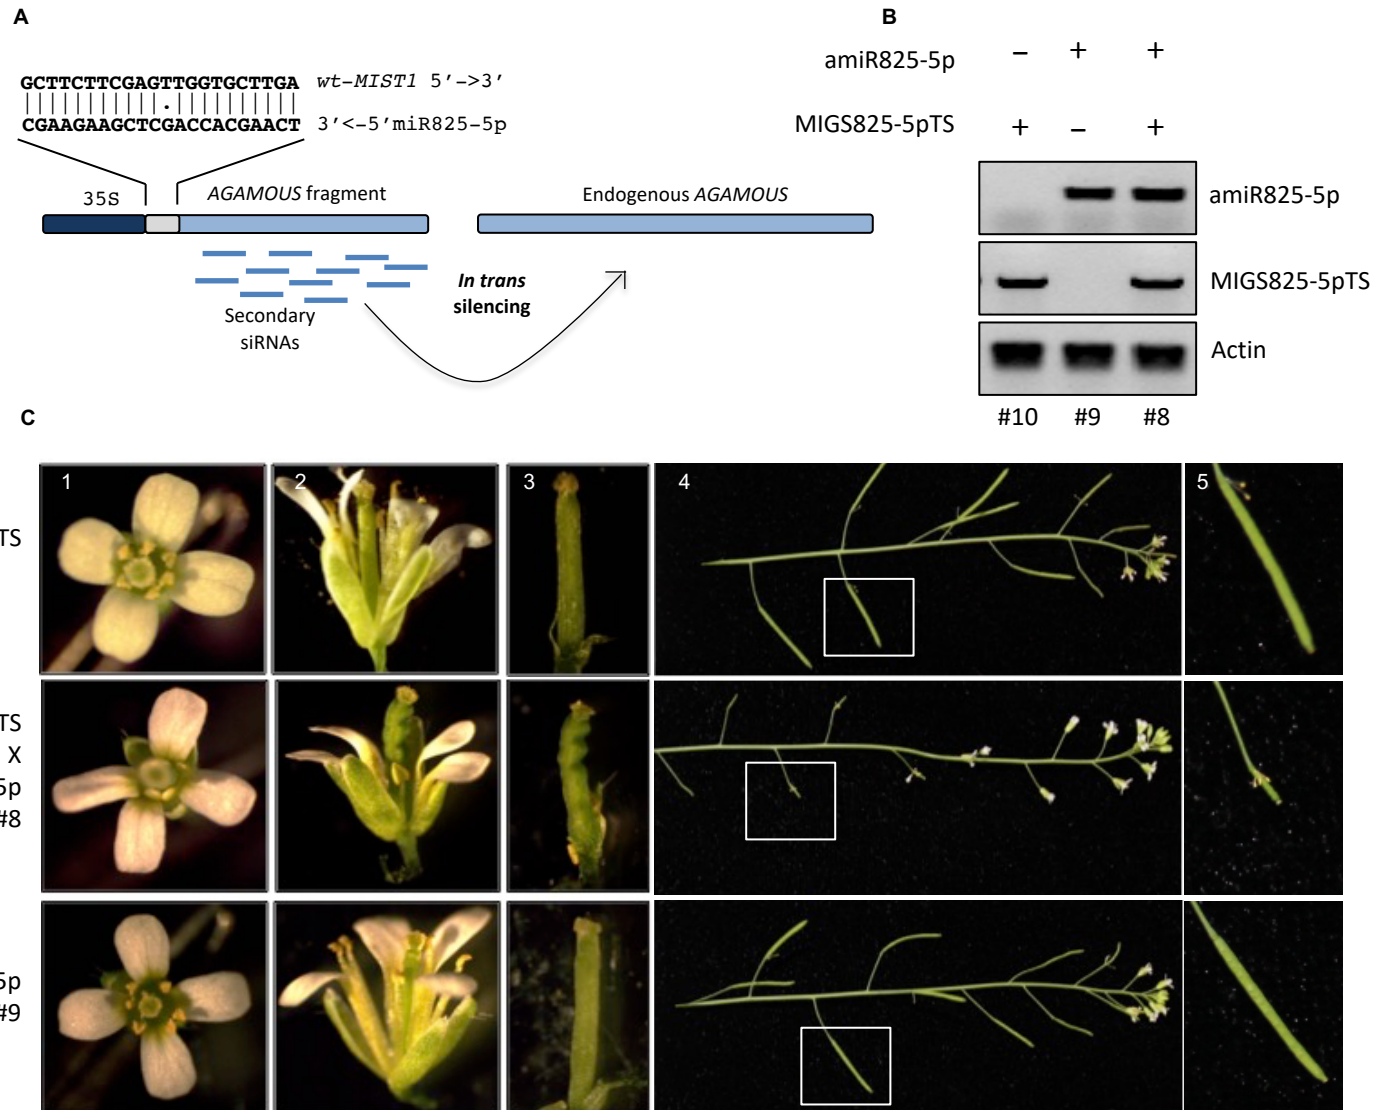

**Figure 10**

**A**

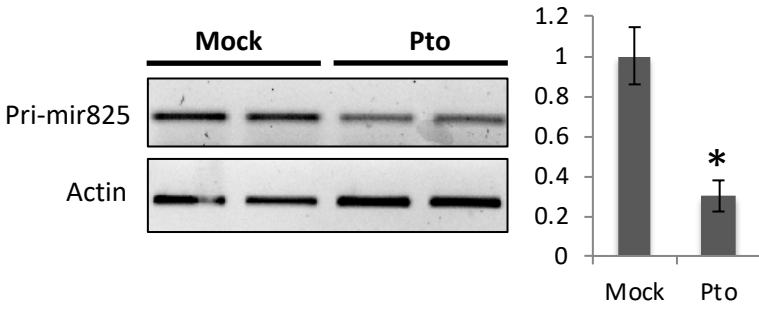

**F**

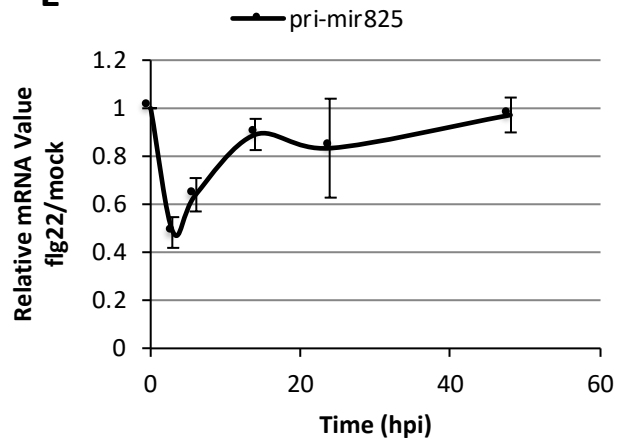

**F**

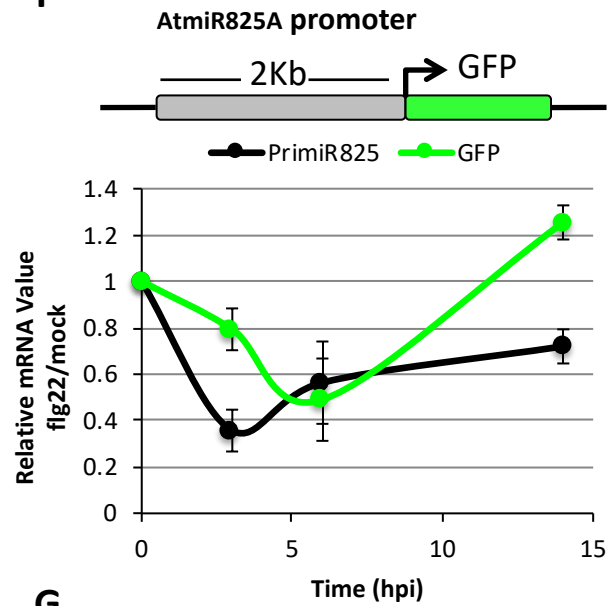

**B**

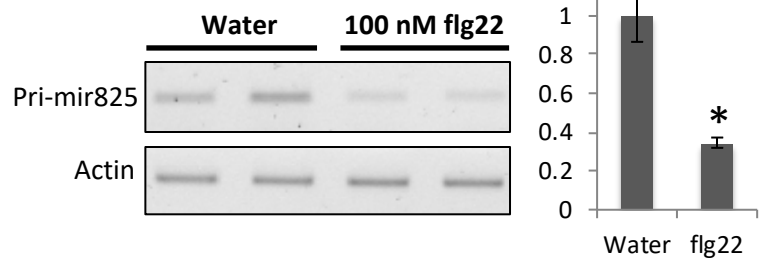

**C**

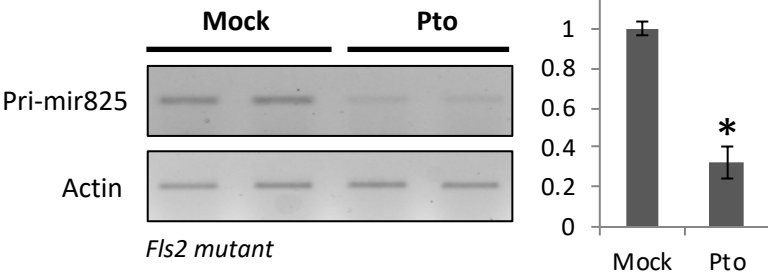

**D**

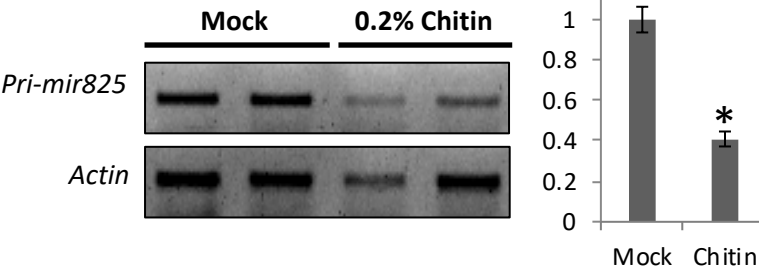

**H**

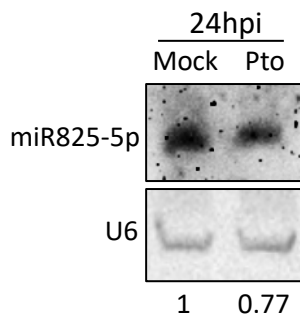

**I**

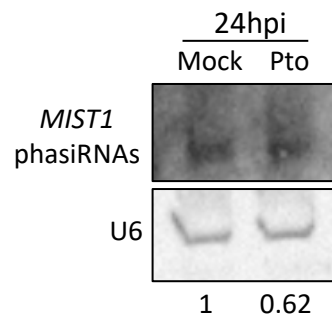

**G**

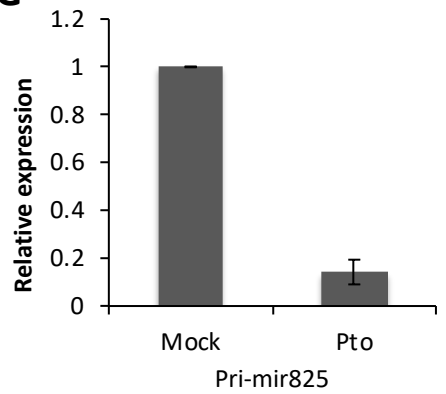

**Figure 11**

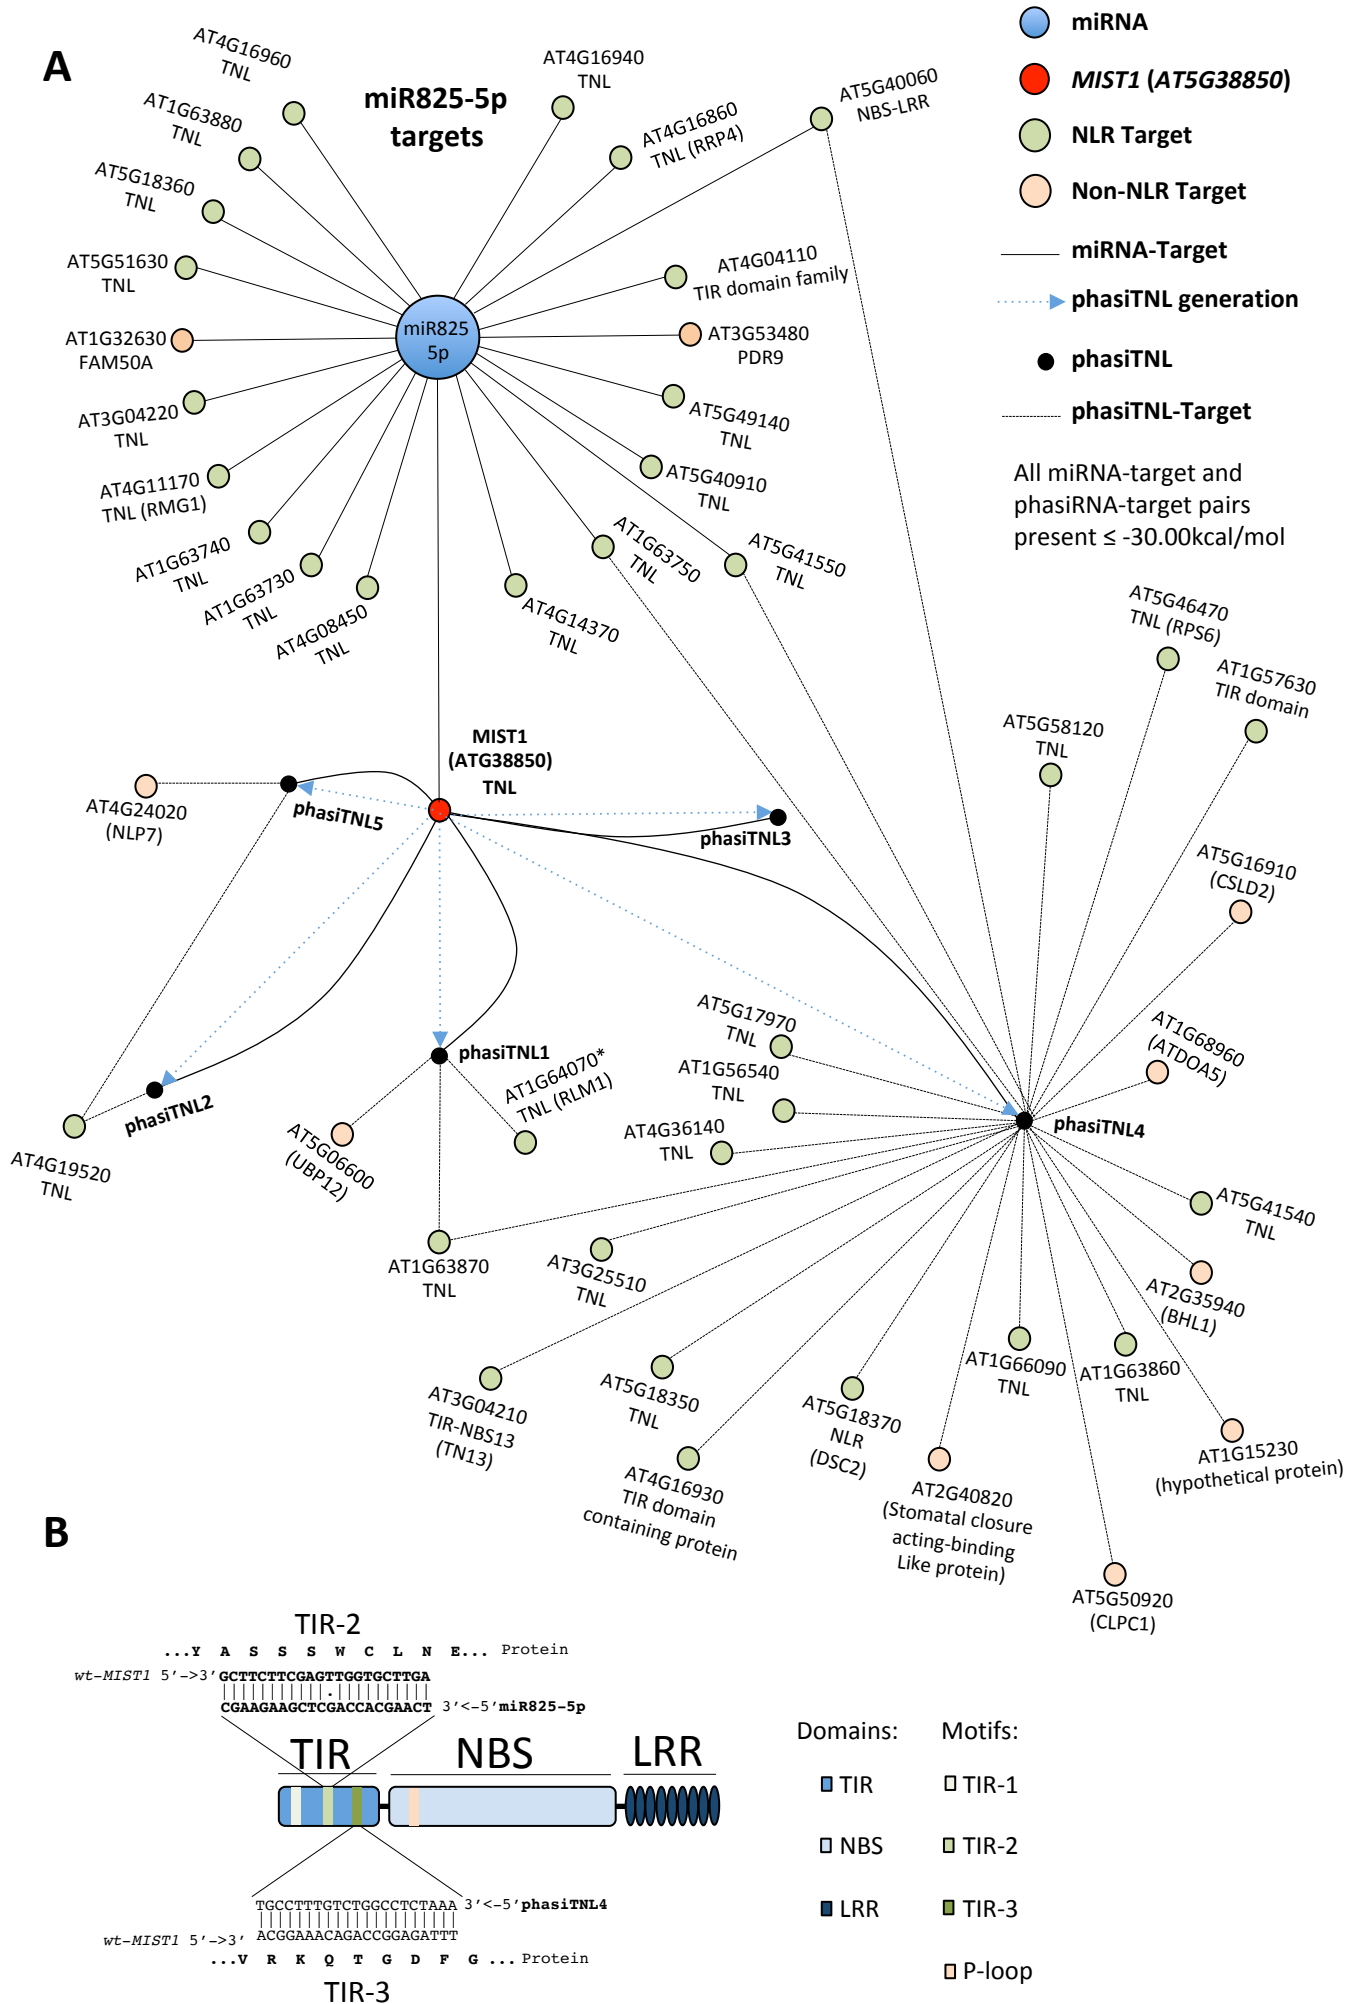

Figure 12

Plant Cell

*ATMIRNA825A*

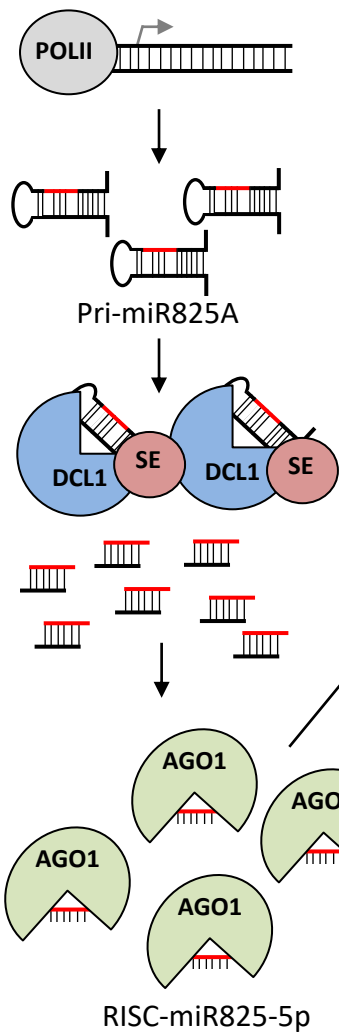

*MIST1*

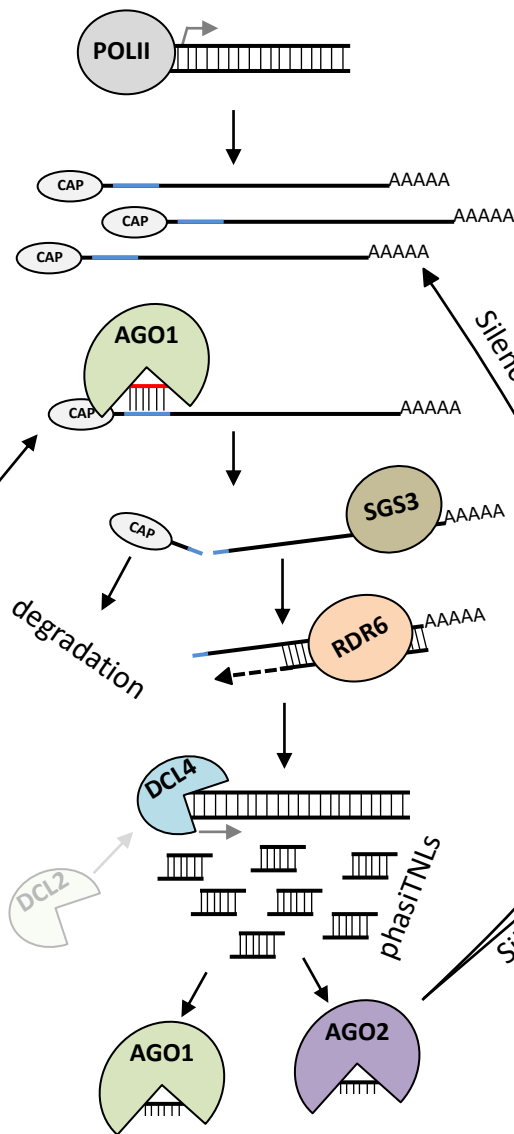

Others TIR-NBS-LRR genes

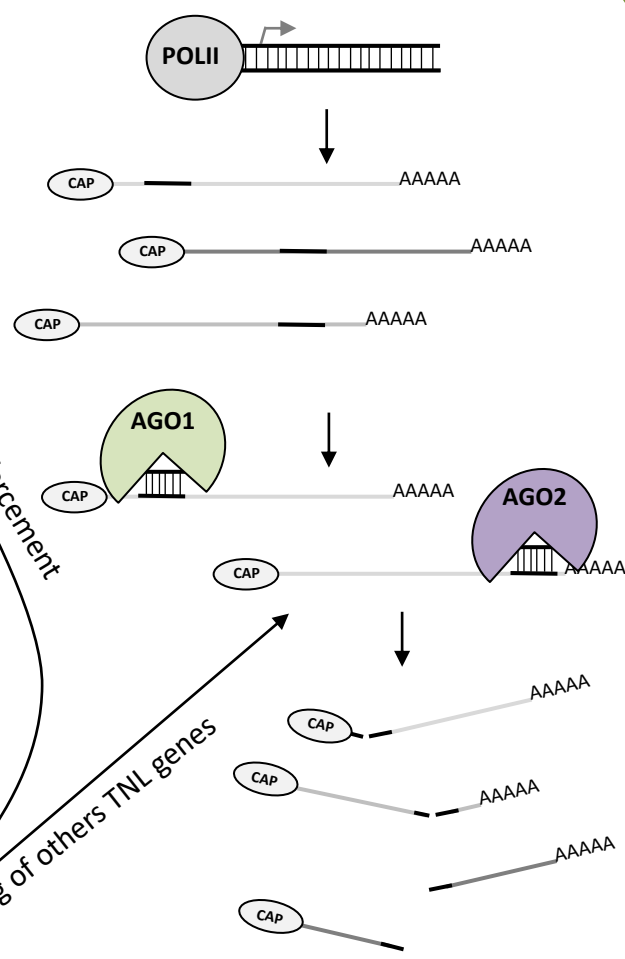

Silencing reinforcement

Silencing of others TNL genes
